# Supplementary material for: Eco-friendly reactions in PEG-400: a highly efficient and green approach for stereoselective access to multisubstituted 3,4-dihydro-2(1H)-quinazolines using 2-aminobenzylamines
Source: Royal Society of Chemistry journal article supplement (doi:10.1039/c7ra13487h), 2018-01-01

## Supporting Information

### Eco-friendly reactions in PEG-400: highly efficient and green approach for stereoselective access to multisubstituted 3,4-dihydro-2(1*H*)-quinazolines using 2-aminobenzylamines

Nutan Sharma,<sup>a</sup> Pankaj Sharma,<sup>a</sup> Sunita Bhagat<sup>a\*</sup>

<sup>a</sup>*Organic Synthesis Research Laboratory, Department of Chemistry, A.R.S.D. College, University of Delhi, New Delhi-110021, India.*

Email id: [sunitabhagat28@gmail.com](mailto:sunitabhagat28@gmail.com)

| S. No. |                                                                                     | Page No. |
|--------|-------------------------------------------------------------------------------------|----------|
| 1.     | X-ray crystallographic data of compound <b>4o</b>                                   | 2-3      |
| 2.     | Synthesis & analytical data of $\alpha$ -oxo ketene dithioacetals ( <b>3a-c</b> )   | 4-4      |
| 3.     | References                                                                          | 5-5      |
| 4.     | Copies of <sup>1</sup> H and <sup>13</sup> C NMRs ( <b>3a-c</b> ) & ( <b>2a-j</b> ) | 7-18     |
| 7.     | Copies of <sup>1</sup> H and <sup>13</sup> C NMRs ( <b>4a-p</b> )                   | 19-51    |

# X-ray Crystallographic Studies

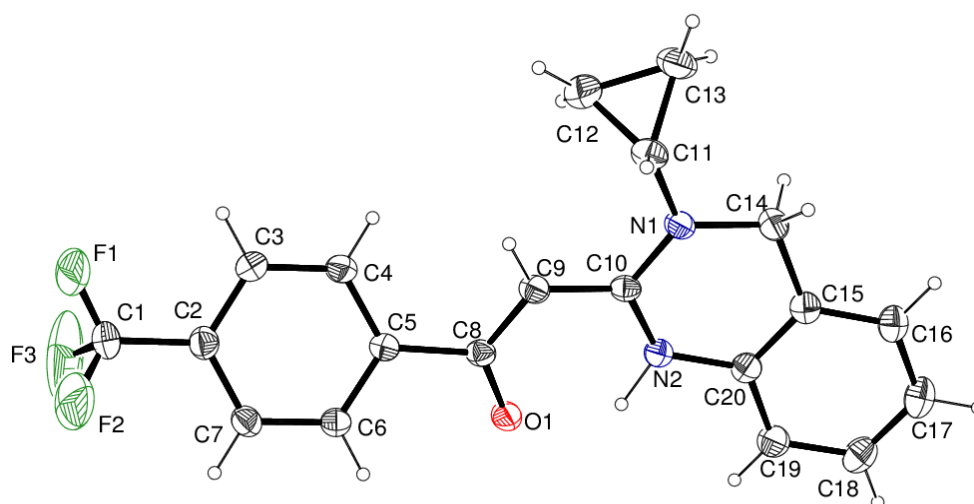

**Figure 1. ORTEP Structure of compound 4o**

The intensity data for 4o was collected on an Oxford CCD diffractometer with an Xcalibur sapphire diffraction measurement Mo-K $\alpha$  radiation ( $\lambda = 0.71073 \text{ \AA}$ ) at 293(2) K<sup>1</sup>. A multi-scan correction was applied. The structure was solved by the direct methods using SIR-92 and refined by full-matrix least-squares refinement techniques on  $F^2$  using SHELXL97<sup>2</sup>. The hydrogen atoms were placed into the calculated positions and included in the last cycles of the refinement. All calculations were done using Wingx software package<sup>3</sup>.

Table1. Crystal data collection and structure refinement parameters for **4o**

|                                                                        |                                                                 |
|------------------------------------------------------------------------|-----------------------------------------------------------------|
| Empirical formula                                                      | C <sub>20</sub> H <sub>17</sub> F <sub>3</sub> N <sub>2</sub> O |
| Formula weight                                                         | 358.36                                                          |
| Temperature                                                            | 293(2) K                                                        |
| Wavelength                                                             | 0.71073 Å                                                       |
| Crystal system                                                         | triclinic                                                       |
| Space group                                                            | <i>P</i> -1                                                     |
| <i>a</i>                                                               | 7.2030(7) Å                                                     |
| <i>b</i>                                                               | 10.0784(8) Å                                                    |
| <i>c</i>                                                               | 13.335(2) Å                                                     |
| $\alpha$                                                               | 108.279(9)°                                                     |
| $\beta$                                                                | 92.593(10)°                                                     |
| $\gamma$                                                               | 107.656(8)°                                                     |
| Volume                                                                 | 865.30(17) Å <sup>3</sup>                                       |
| <i>Z</i>                                                               | 2                                                               |
| Density (calculated)                                                   | 1.375 Mg/m <sup>3</sup>                                         |
| Absorption coefficient                                                 | 0.108 mm <sup>-1</sup>                                          |
| <i>F</i> (000)                                                         | 372                                                             |
| Crystal size                                                           | 0.22 x 0.19 x 0.18 mm <sup>3</sup>                              |
| Theta range for data collection                                        | 3.10 to 25.00°                                                  |
| Index ranges                                                           | -8 ≤ <i>h</i> ≤ 6, -11 ≤ <i>k</i> ≤ 11, -15 ≤ <i>l</i> ≤ 15     |
| Reflections collected                                                  | 5952                                                            |
| Independent reflections                                                | 3048 [ <i>R</i> (int) = 0.0143]                                 |
| Completeness to theta = 25.00°                                         | 99.9 %                                                          |
| Absorption correction                                                  | Multi-scan                                                      |
| Max. and min. transmission                                             | 0.9808 and 0.9767                                               |
| Refinement method                                                      | Full-matrix least-squares on <i>F</i> <sup>2</sup>              |
| Data / restraints / parameters                                         | 3048 / 0 / 236                                                  |
| Goodness-of-fit on <i>F</i> <sup>2</sup>                               | 1.051                                                           |
| Final <i>R</i> indices [ <i>I</i> >2sigma( <i>I</i> )] <sup>a, b</sup> | <i>R</i> <sub>1</sub> = 0.0852, <i>wR</i> <sub>2</sub> = 0.2504 |
| <i>R</i> indices (all data)                                            | <i>R</i> <sub>1</sub> = 0.1057, <i>wR</i> <sub>2</sub> = 0.2691 |
| Extinction coefficient                                                 | 0.034(9)                                                        |
| Largest diff. peak and hole                                            | 0.826 and -0.576 e.Å <sup>-3</sup>                              |

$$^aR = \sum(|F_o| - |F_c|) / \sum |F_o| ; ^b wR = \{ \sum [w(F_o^2 - F_c^2)] / \sum [w(F_o^2)] \}^{1/2}$$

### General procedure for the synthesis of $\alpha$ -oxoketene dithioacetals (3a-c)

The procedure for the synthesis of  $\alpha$ -oxoketene dithioacetals is previously reported.<sup>4</sup> Compounds **2a-c** are previously reported.<sup>4</sup> The structure and purity of known starting material was confirmed by comparison of physical and spectral data (<sup>1</sup>H NMR, <sup>13</sup>C NMR) with those reported in literature.

### Analytical data of $\alpha$ -oxoketene dithioacetals

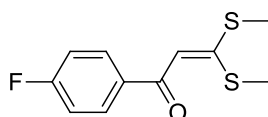

**1-(4-Fluoro-phenyl)-3,3-bis-methylsulfanyl-propenone (3a)** The

compound was obtained as a yellow crystalline solid, mp 83-85°C: IR ( $\nu_{\max}$ cm<sup>-1</sup>) (CHCl<sub>3</sub>): 2919, 1597, 1470; <sup>1</sup>H NMR (400 MHz, CDCl<sub>3</sub>)  $\delta$ : 7.92-7.88 (m, 2H), 7.08 (t,  $J$  = 8.79Hz, 2H), 6.68 (s, 1H, vinylic CH), 2.51 (s, 6H, 2 x SCH<sub>3</sub>); <sup>13</sup>C NMR (100 MHz, CDCl<sub>3</sub>)  $\delta$ : 184.05, 166.9, 166.1, 163.6, 135.3, 129.8, 115.3, 108.9 (vinylic CH), 17.3 (-SCH<sub>3</sub>), 15.0 (-SCH<sub>3</sub>); HRMS (ESI) (M+H)<sup>+</sup> Calcd for C<sub>11</sub>H<sub>11</sub>FOS<sub>2</sub>: 243.0313, found 243.0306.

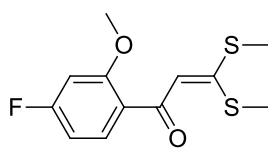

**1-(4-Fluoro-2-methoxy-phenyl)-3,3-bis-methylsulfanyl-propenone (3b)**

The compound was obtained as a pale yellow solid, mp 96-98°C: IR ( $\nu_{\max}$ cm<sup>-1</sup>) (CHCl<sub>3</sub>): 2920, 1592, 1471; <sup>1</sup>H NMR (400 MHz, CDCl<sub>3</sub>)  $\delta$ : 7.77 (dd,  $J$  = 8.79, 7.32 Hz, 1H), 6.84 (s, 1H, vinylic CH), 6.68 (td,  $J$  = 8.79, 8.05 Hz, 2.2, 1H), 6.62 (dd,  $J$  = 10.98, 2.2 Hz, 1H), 3.8 (s, 3H, Ar-OCH<sub>3</sub>), 2.48 (s, 3H, (-SCH<sub>3</sub>), 2.47 (s, 3H, (-SCH<sub>3</sub>)); <sup>13</sup>C NMR (100 MHz, CDCl<sub>3</sub>)  $\delta$ : 184.3, 166.5, 164.0, 158.8, 132.6, 125.7, 114.4, 107.7 (vinylic CH), 99.4, 55.7 (Ar-OCH<sub>3</sub>), 17.2(-SCH<sub>3</sub>), 15.0(-SCH<sub>3</sub>).

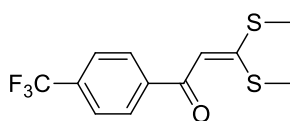

**3,3-Bis-methylsulfanyl-1-(4-trifluoromethyl-phenyl)-propenone (3c)**

The compound was obtained as a dark yellow solid, mp 84-86°C: IR ( $\nu_{\max}$ cm<sup>-1</sup>) (CHCl<sub>3</sub>): 2992, 1480, 1323; <sup>1</sup>H NMR (400 MHz, CDCl<sub>3</sub>)  $\delta$ : 7.98 (d,  $J$  = 8.05 Hz, 2H), 7.67 (d,  $J$  = 8.05 Hz, 2H), 6.7 (s, 1H, vinylic CH), 2.56 (s, 3H, -SCH<sub>3</sub>), 2.53 (s, 3H, -SCH<sub>3</sub>); <sup>13</sup>C NMR (100 MHz, CDCl<sub>3</sub>)  $\delta$ : 184.1, 168.8, 142.0, 127.9, 125.4, 108.6 (vinylic CH), 17.3(-SCH<sub>3</sub>), 15.0(-SCH<sub>3</sub>); HRMS (ESI) (M+H)<sup>+</sup> Calcd for C<sub>12</sub>H<sub>11</sub>F<sub>3</sub>OS<sub>2</sub>: 293.0281, found 293.0273.

## References:

1. *CrysAlisPro*, v. 1.171.33.49b, Oxford Diffraction Ltd., Abingdon, UK, **2009**.
2. G. M. Sheldrick, *Acta Cryst.*, **2008**, A64, 112-122.
3. L. J. Farrugia, WinGX Version 1.80.05, *An integrated system of Windows Programs for the Solution, Refinement and Analysis of Single Crystal X-Ray Diffraction Data*; Department of Chemistry, University of Glasgow (**1997-2009**).
4. N. Sharma, T.S. Chundawat, S. C. Mahopatra, S. Bhagat, *RSC Advances*, **2013**, 3, 16336-16339.

# **COPIES OF $^1\text{H}$ NMR & $^{13}\text{C}$ NMR DATA**

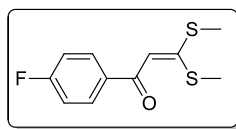

**3a**

**<sup>1</sup>H-NMR in CDCl<sub>3</sub> (400MHz)**

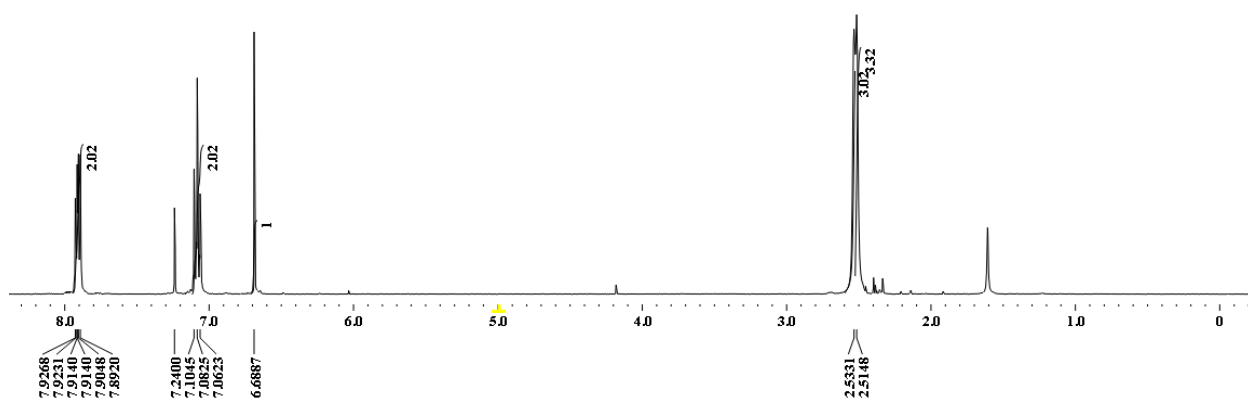

**<sup>13</sup>C NMR in CDCl<sub>3</sub> (100MHz)**

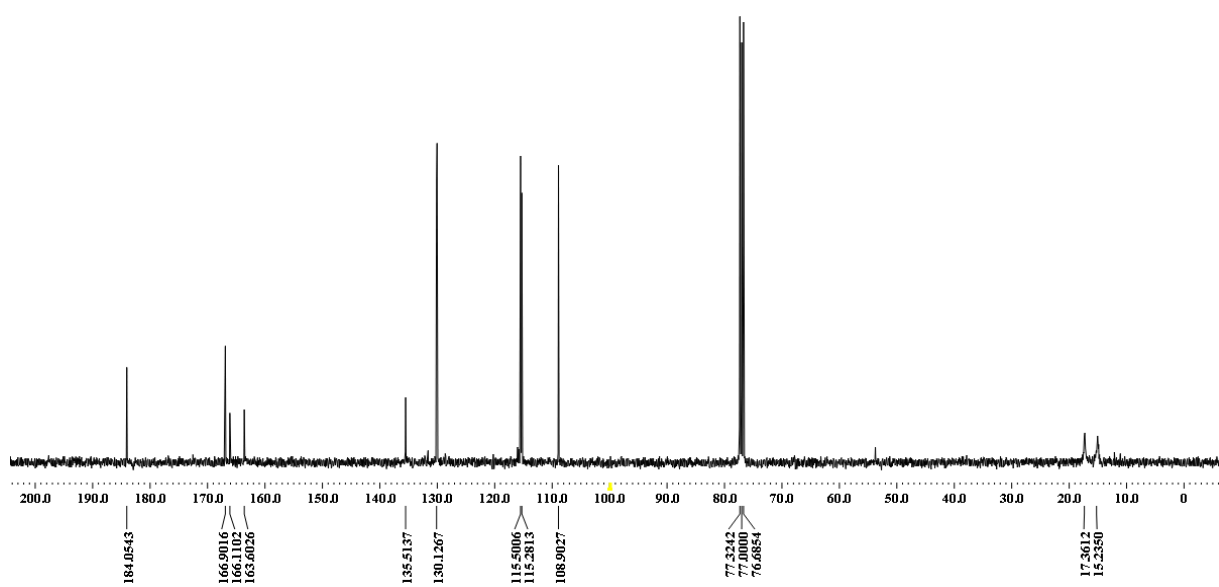

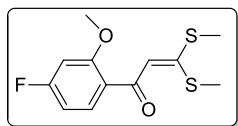

**3b**

**<sup>1</sup>H-NMR in CDCl<sub>3</sub> (400MHz)**

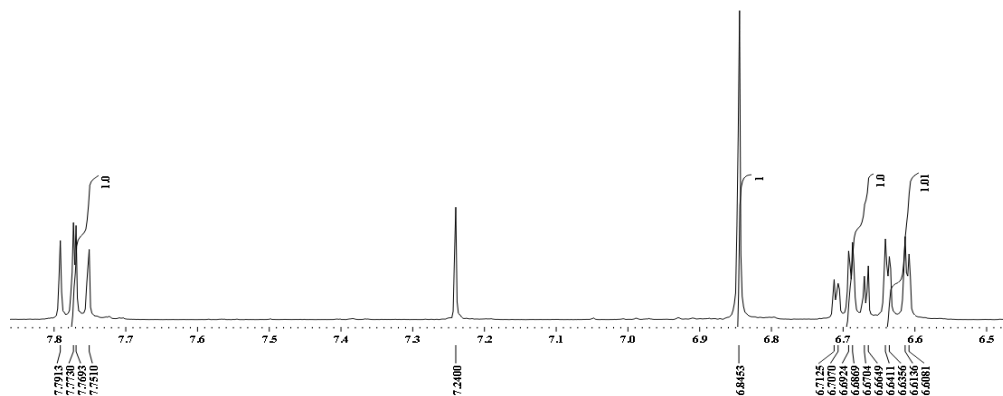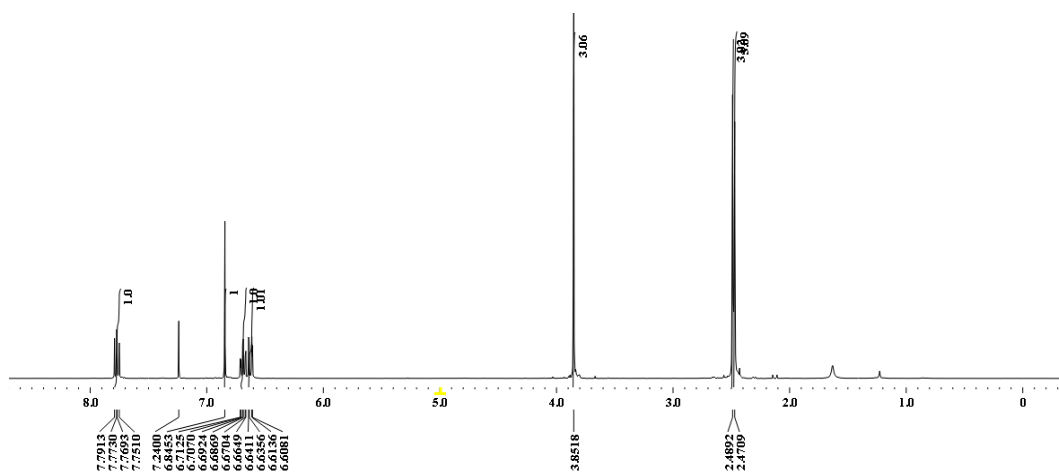

**<sup>13</sup>C-NMR in CDCl<sub>3</sub> (100MHz)**

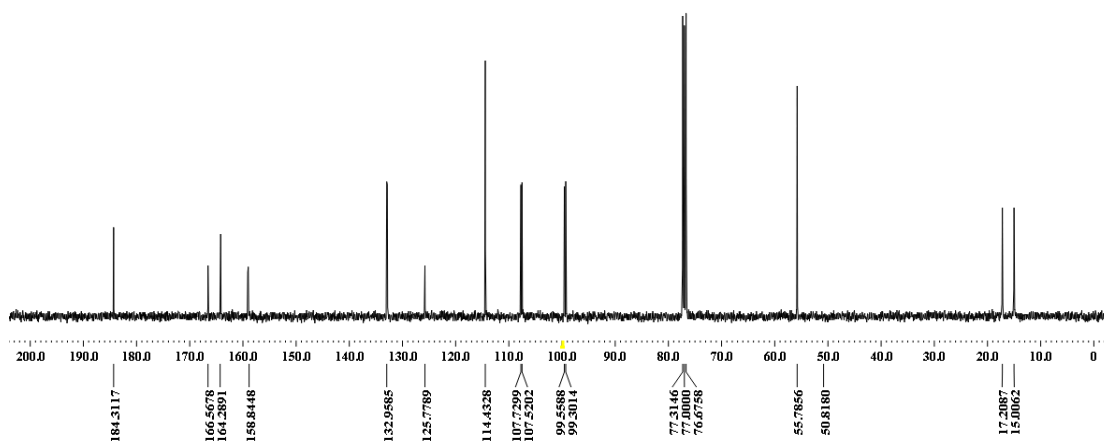



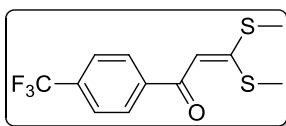

3c

<sup>1</sup>H-NMR in CDCl<sub>3</sub> (400MHz)

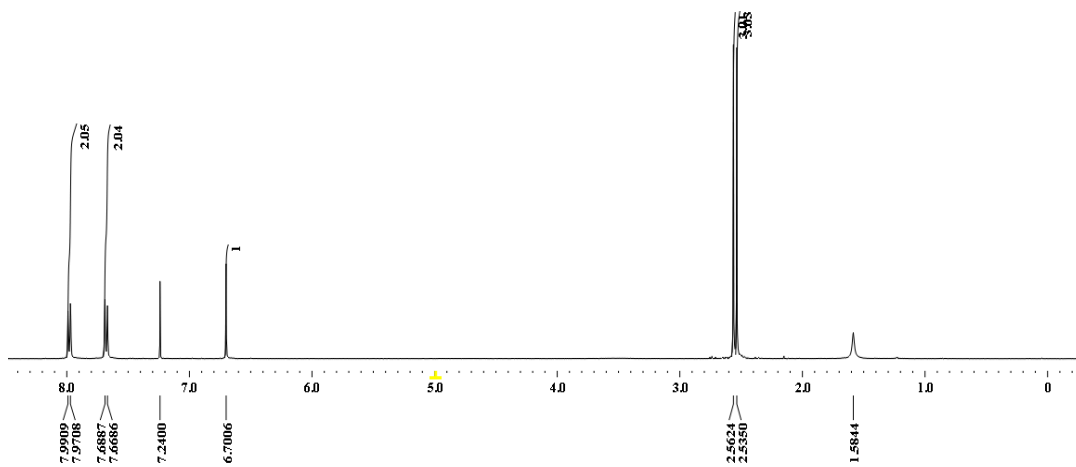

<sup>13</sup>C-NMR in CDCl<sub>3</sub> (100MHz)

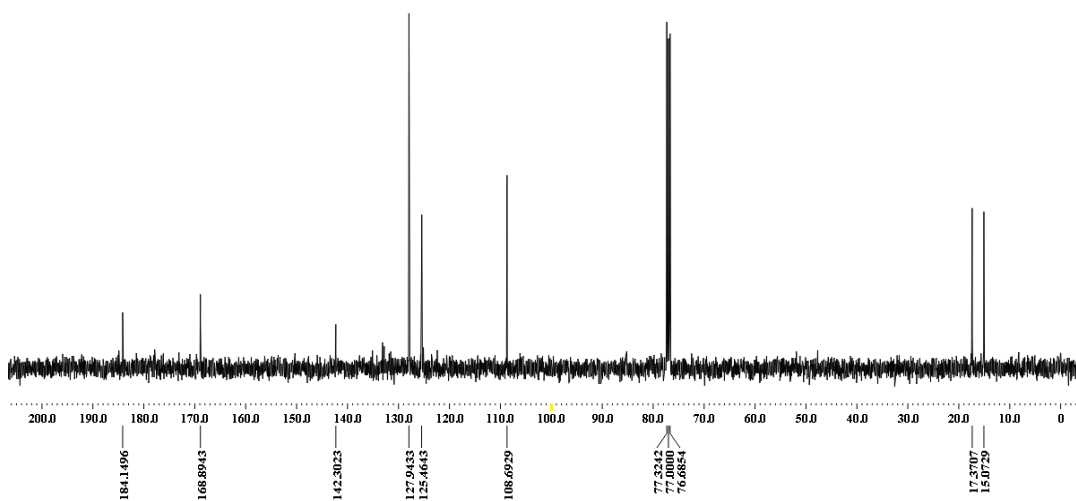

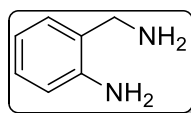

2a

$^1\text{H}$  NMR in DMSO- $d_6$  (400Mz)

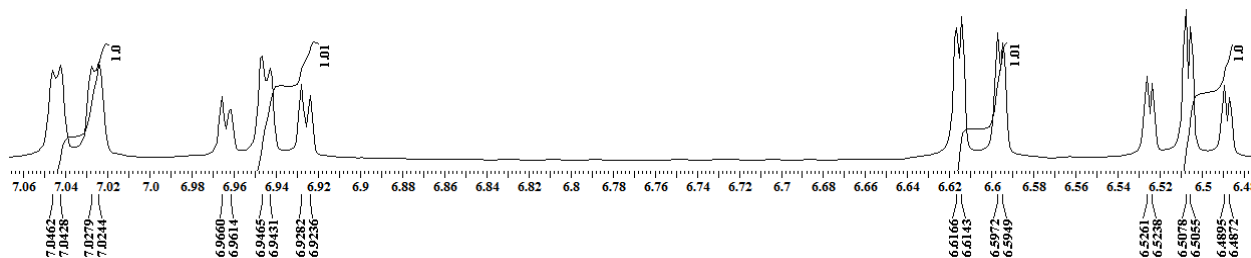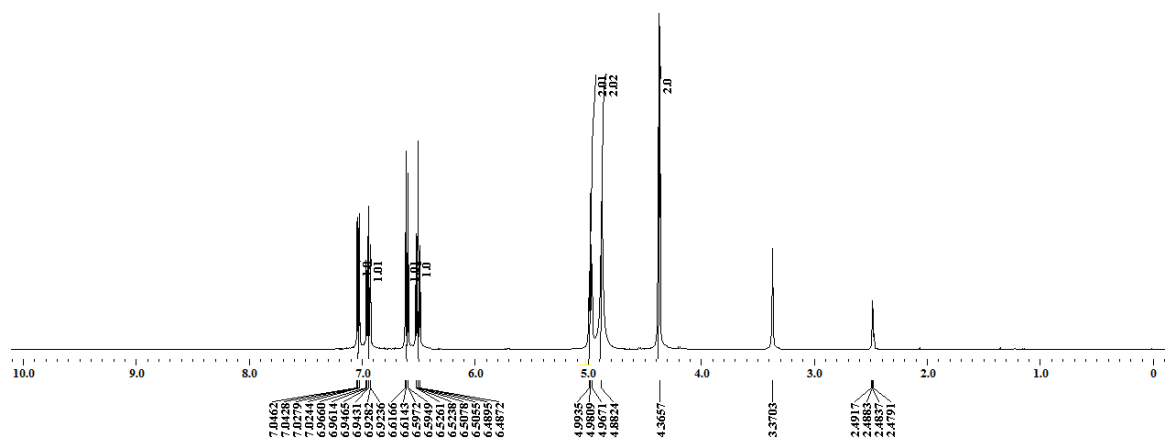

$^{13}\text{C}$ -NMR in DMSO- $d_6$  (100MHz)

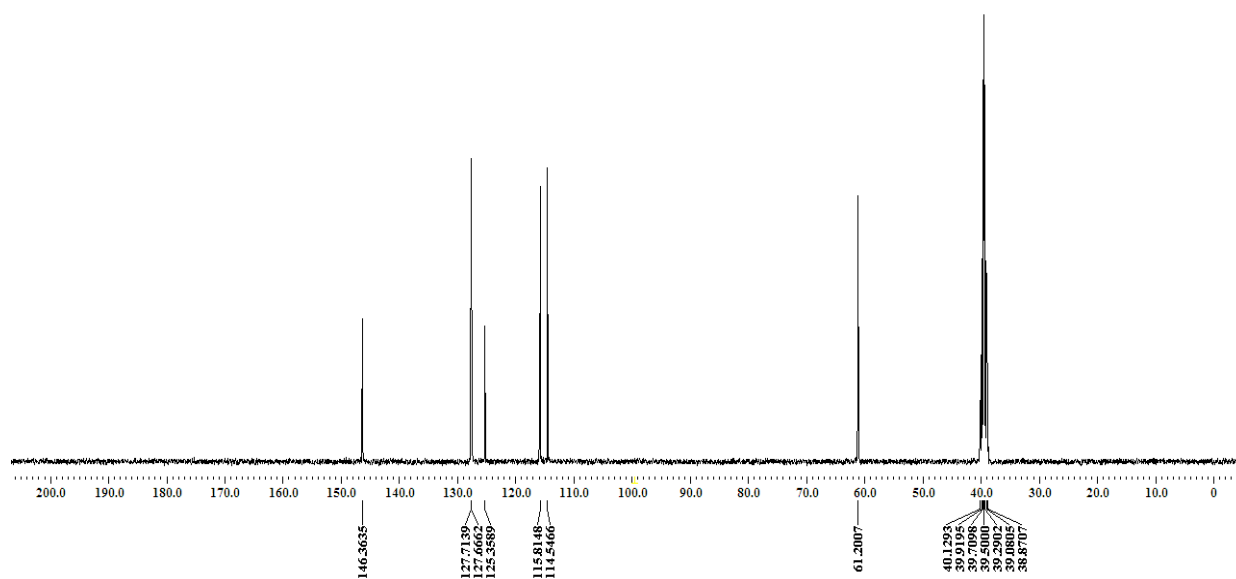

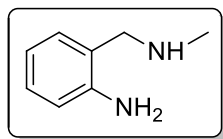

**2b**

**<sup>1</sup>H NMR in DMSO-d<sub>6</sub> (400Mz)**

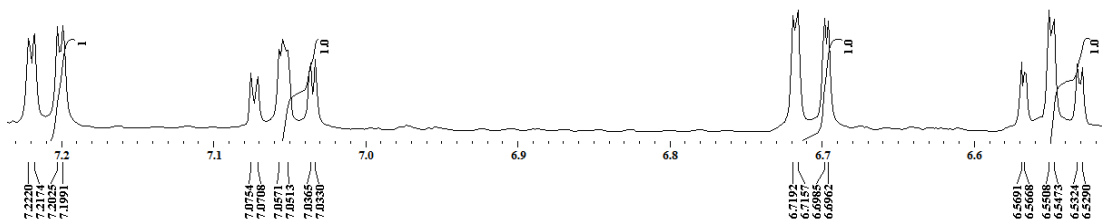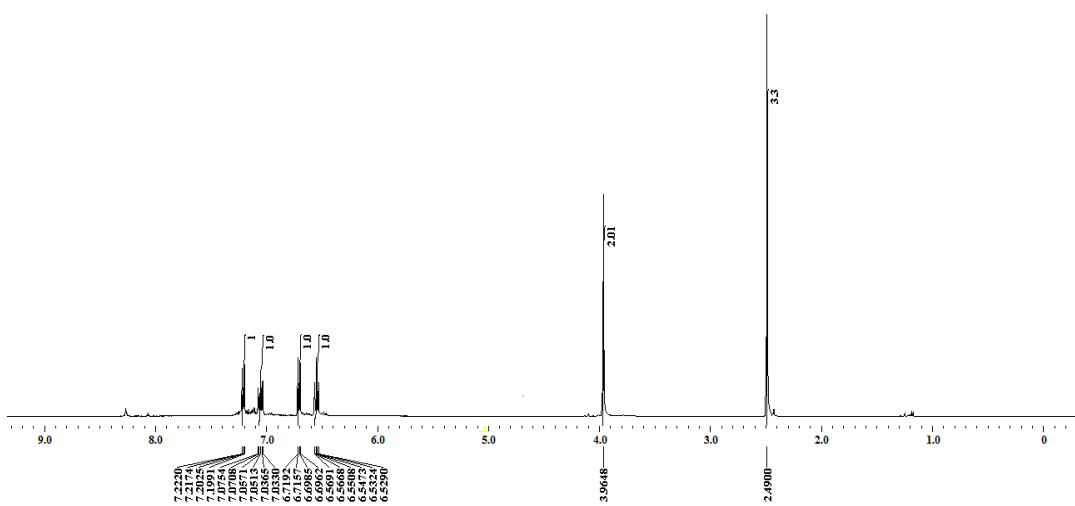

**<sup>13</sup>C-NMR in DMSO-d<sub>6</sub> (100MHz)**

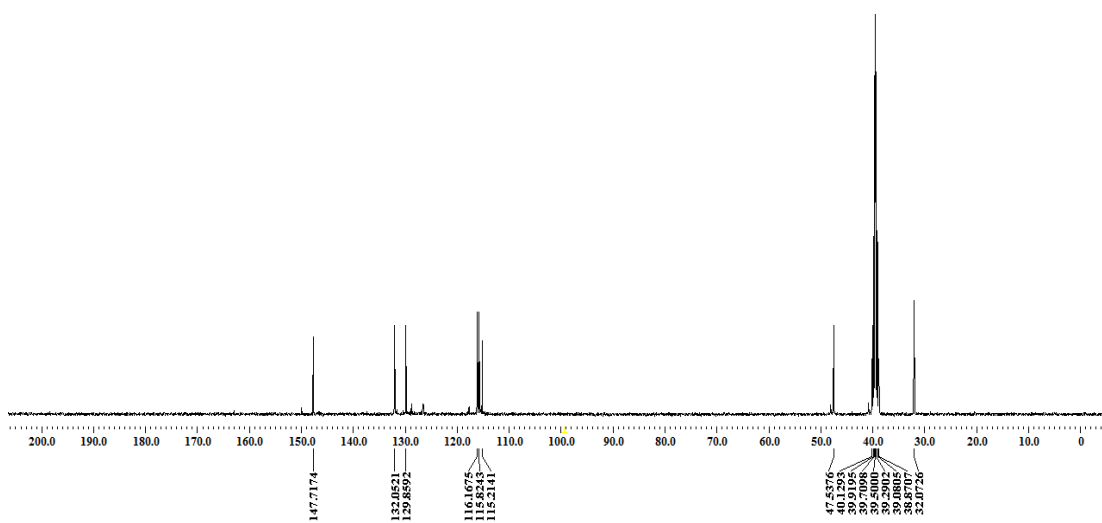

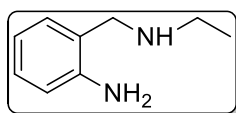

2c

<sup>1</sup>H NMR in DMSO-d<sub>6</sub> (400Mz)

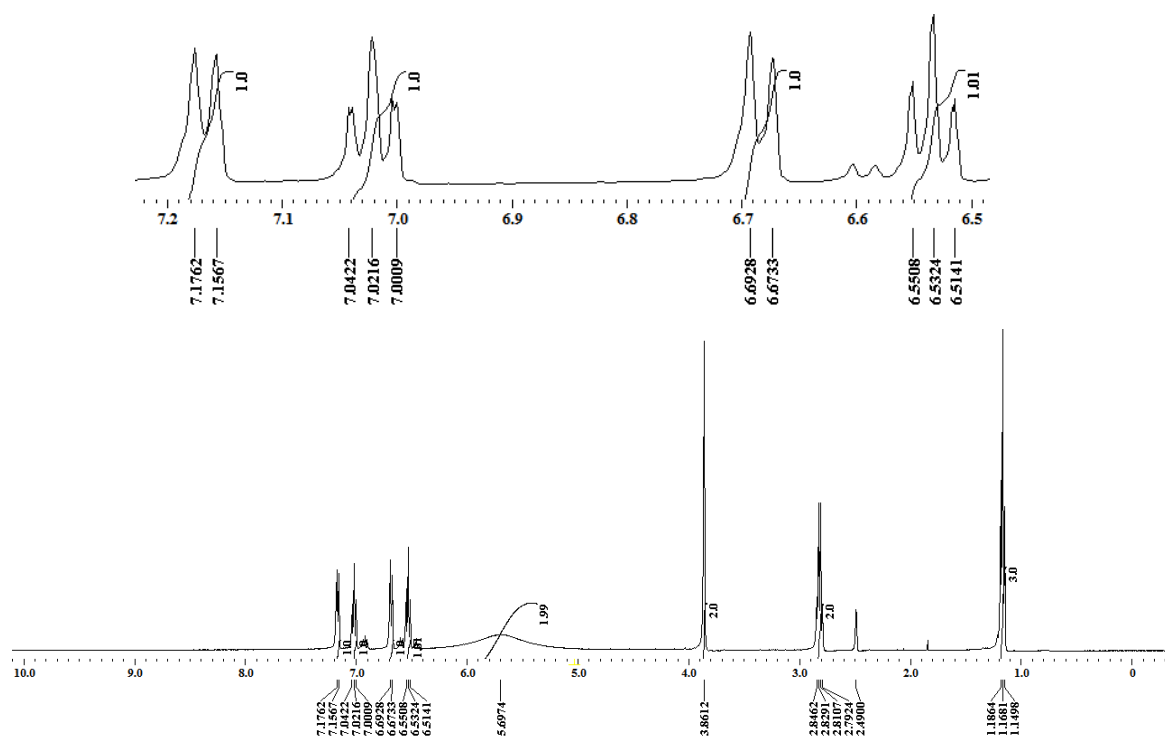

<sup>13</sup>C-NMR in DMSO-d<sub>6</sub> (100MHz)

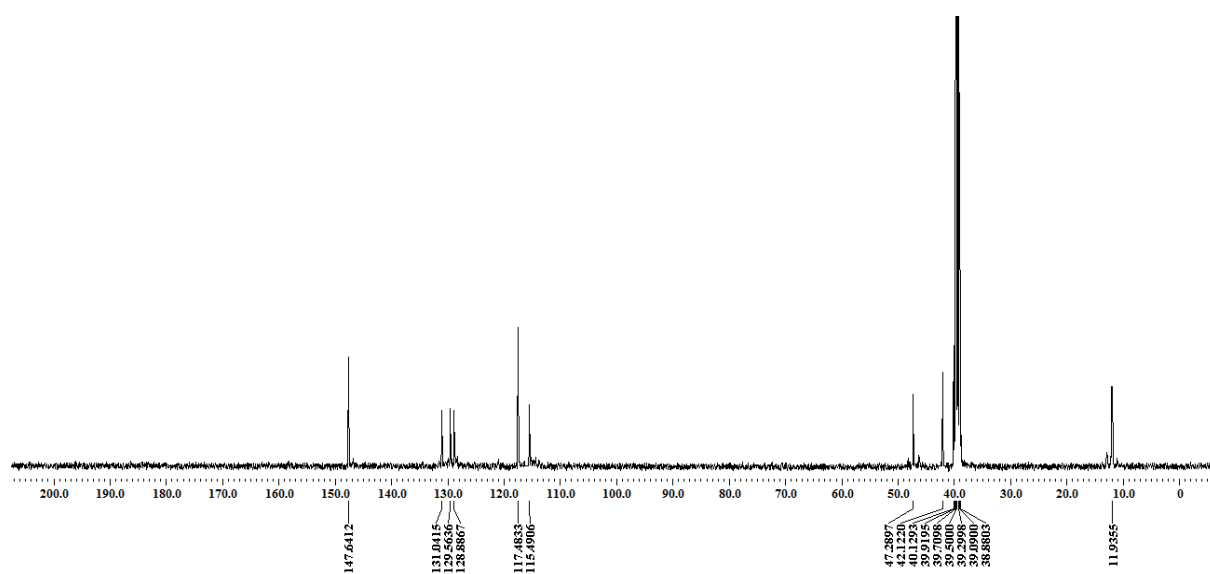

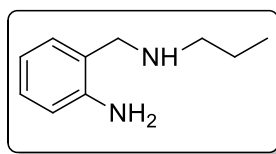

2d

<sup>1</sup>H NMR in DMSO-d<sub>6</sub> (400Mz)

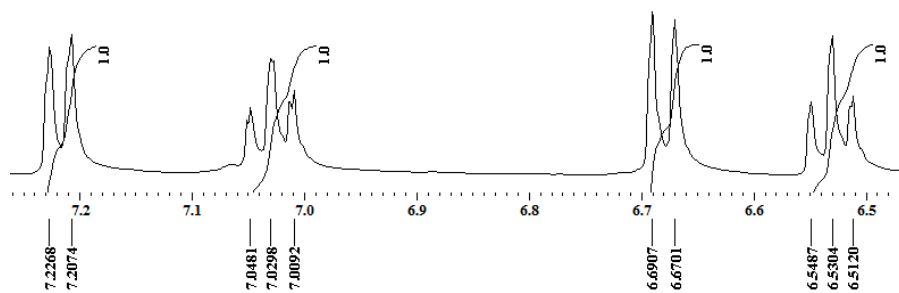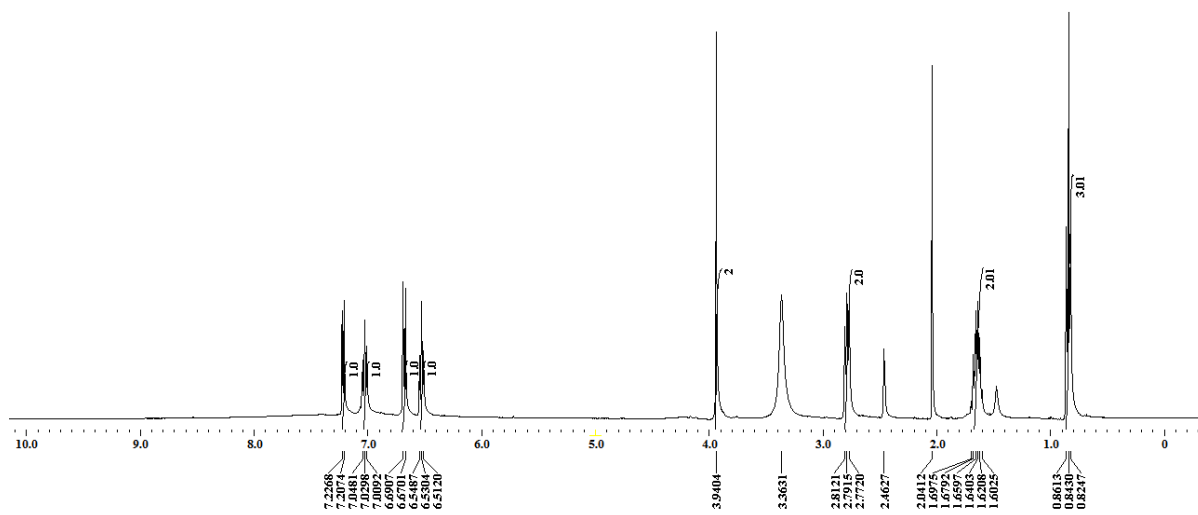

<sup>13</sup>C-NMR in DMSO-d<sub>6</sub> (100MHz)

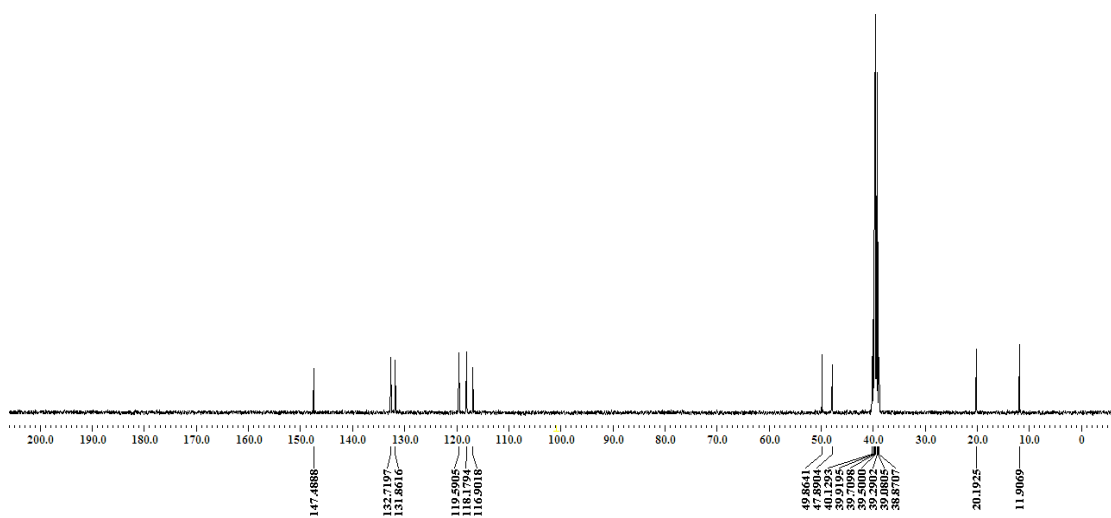

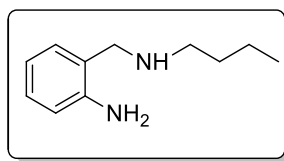

2f

$^1\text{H}$  NMR in DMSO- $d_6$  (400Mz)

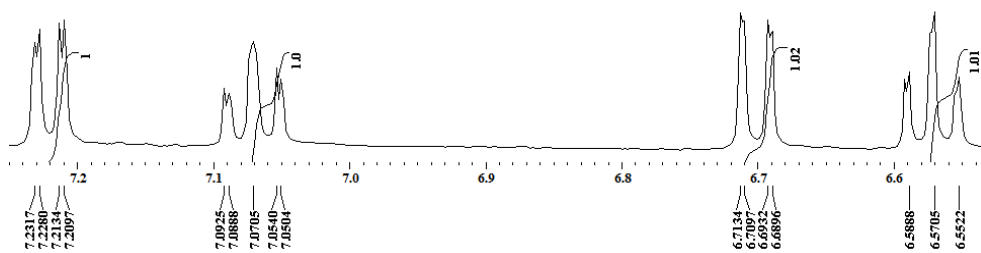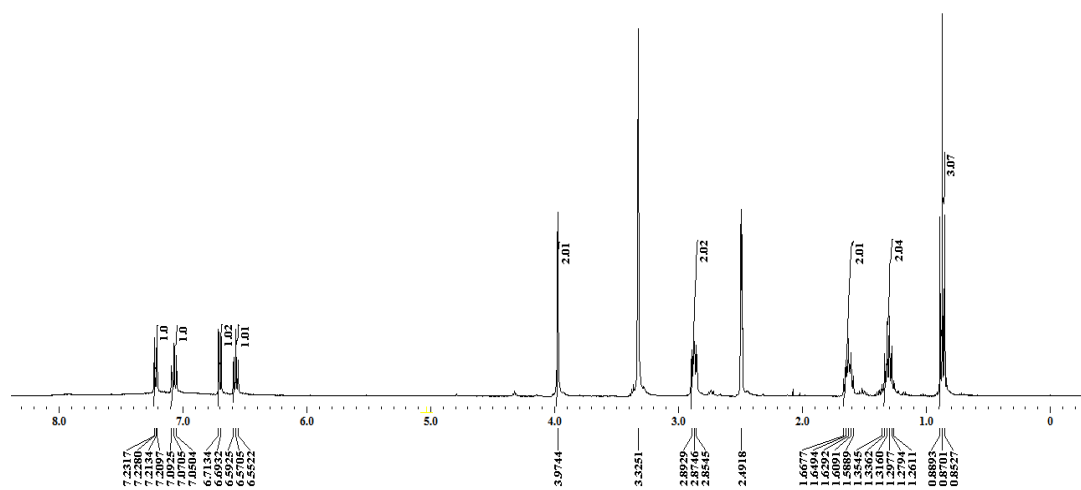

$^{13}\text{C}$  NMR in DMSO- $d_6$  (100Mz)

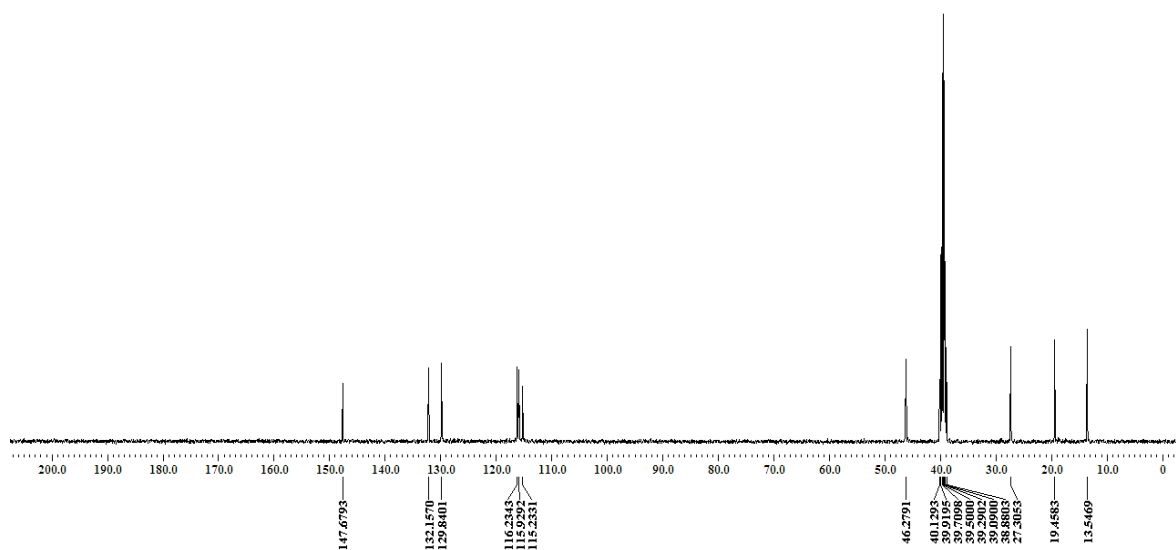

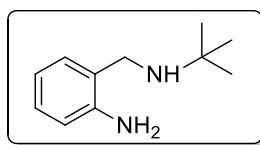

2g

$^1\text{H}$  NMR in DMSO- $d_6$  (400Mz)

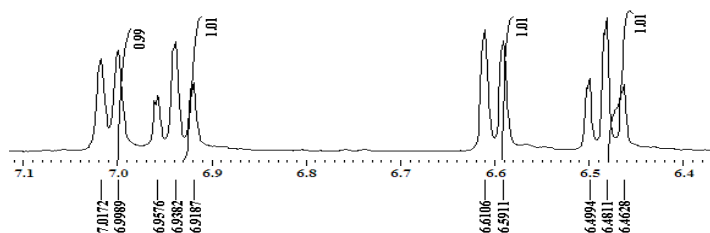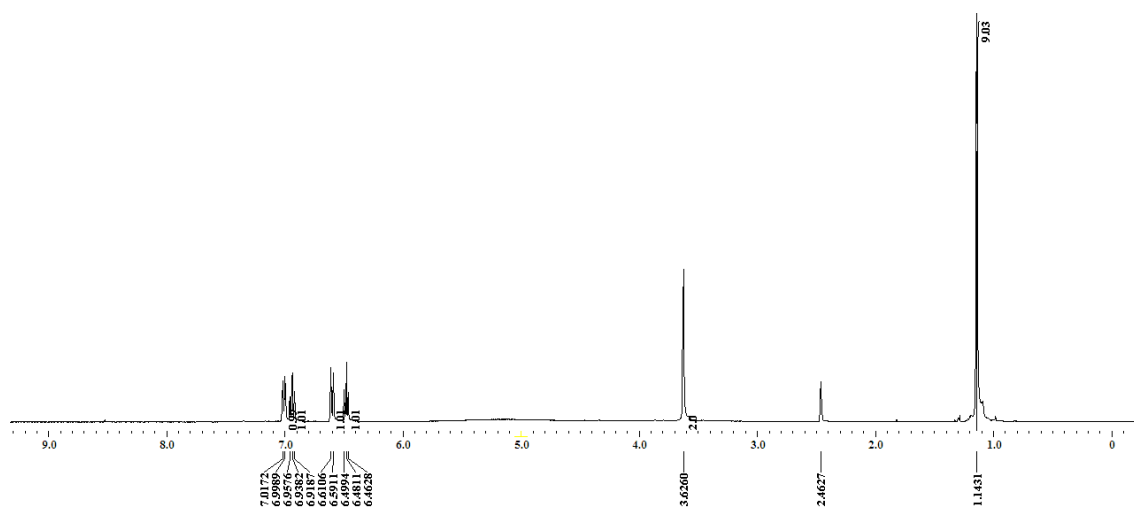

$^{13}\text{C}$  NMR in DMSO- $d_6$  (100Mz)

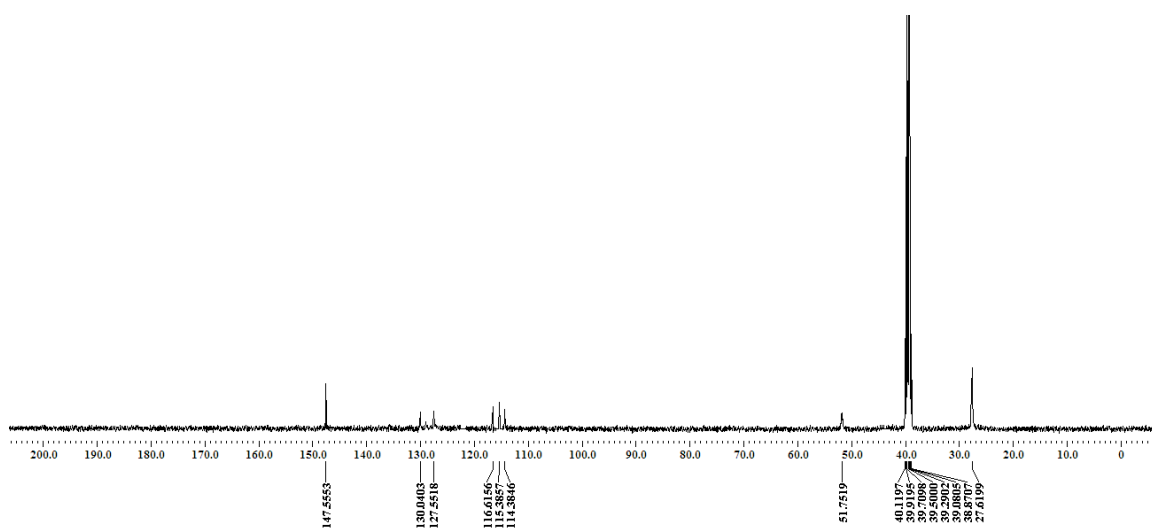

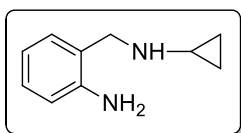

2h

<sup>1</sup>H NMR in DMSO-d<sub>6</sub> (400Mz)

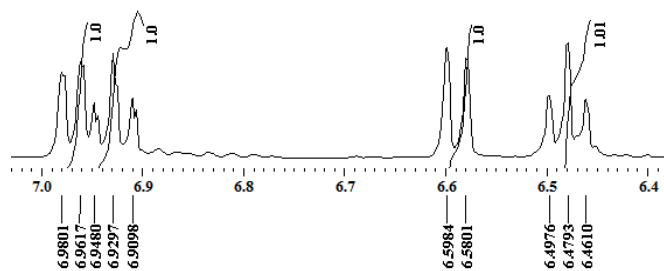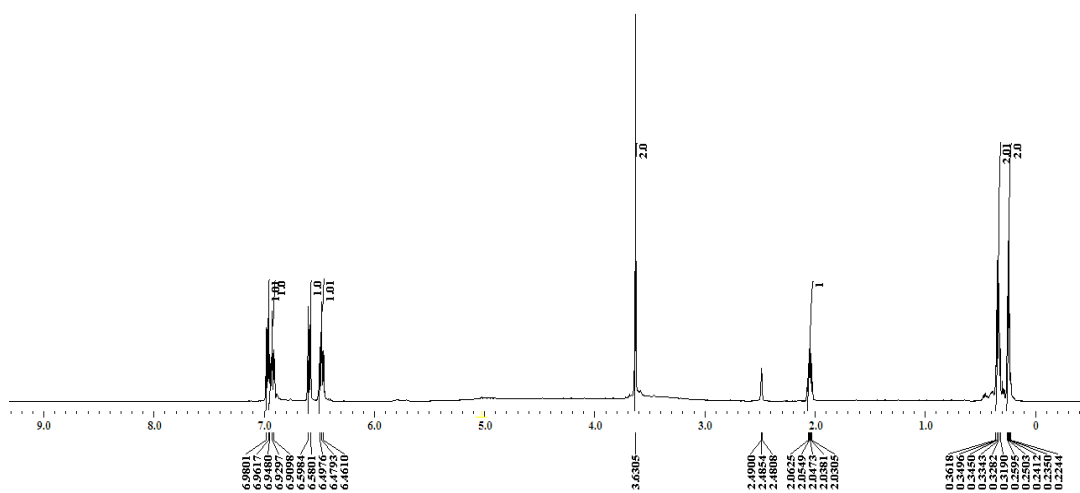

<sup>13</sup>C NMR in DMSO-d<sub>6</sub> (100Mz)

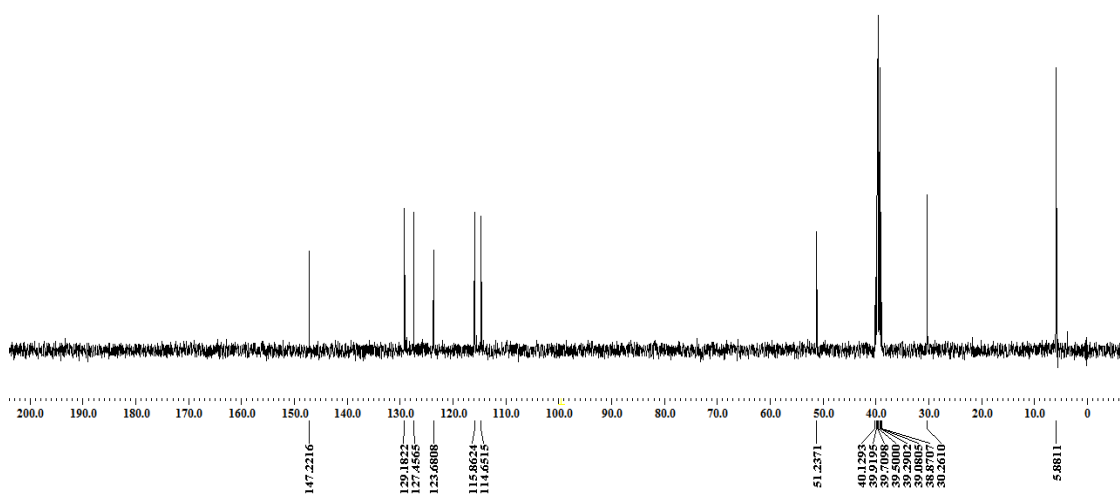



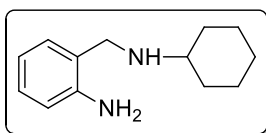

2i

$^1\text{H}$  NMR in DMSO- $d_6$  (400Mz)

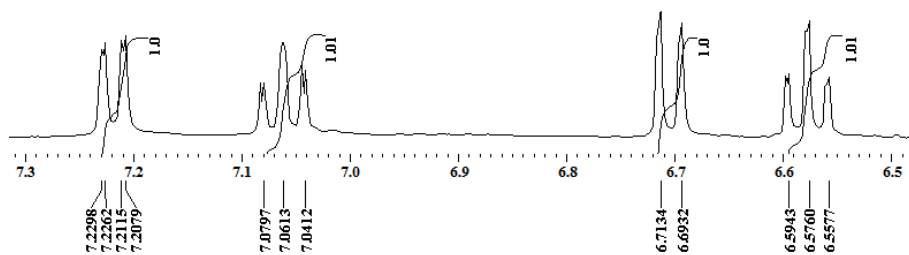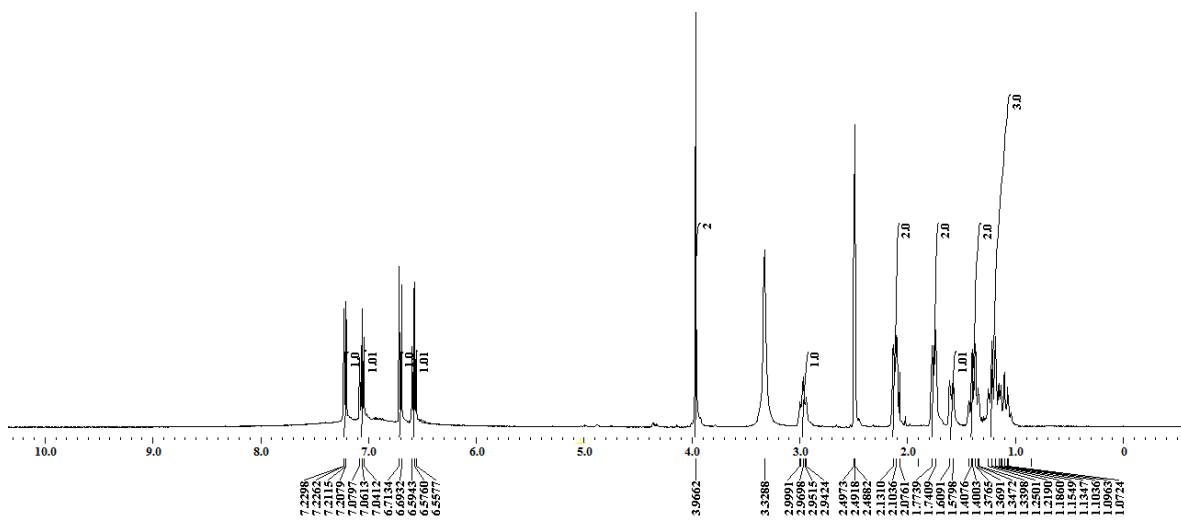

$^{13}\text{C}$  NMR in DMSO- $d_6$  (100Mz)

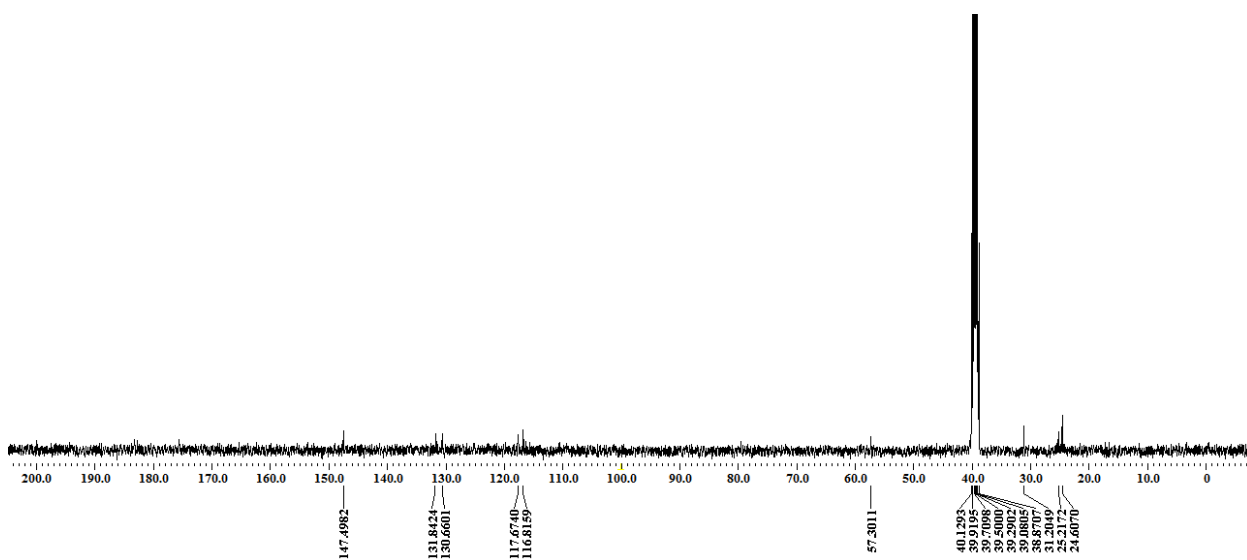

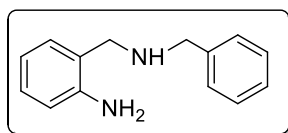

2j

$^1\text{H}$  NMR in DMSO- $d_6$  (400Mz)

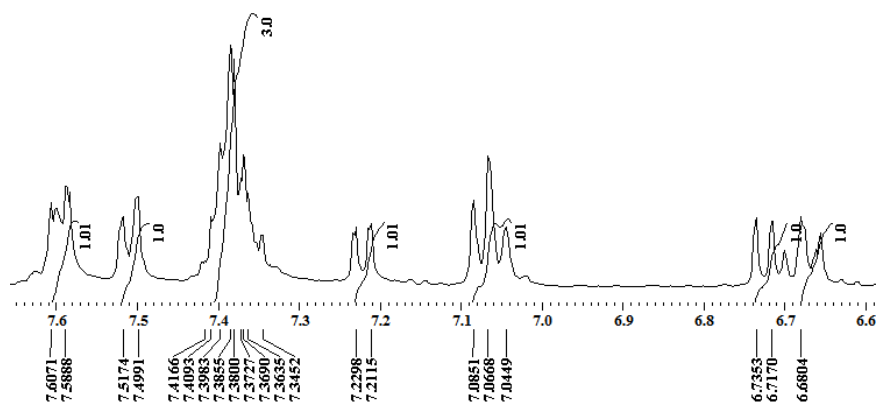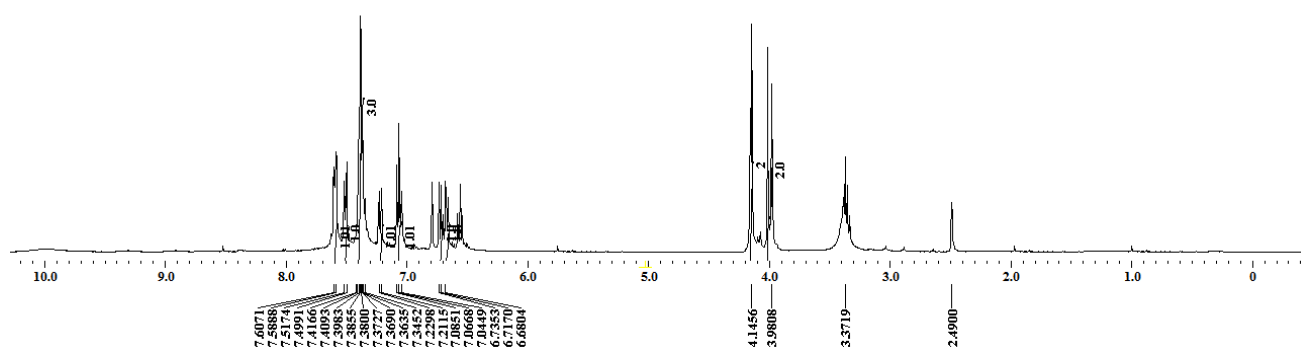

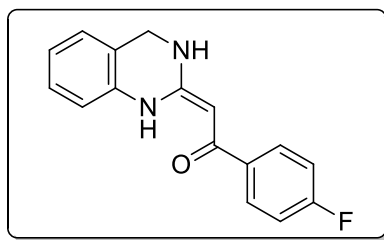

4a

<sup>1</sup>H-NMR in CDCl<sub>3</sub> (400MHz)

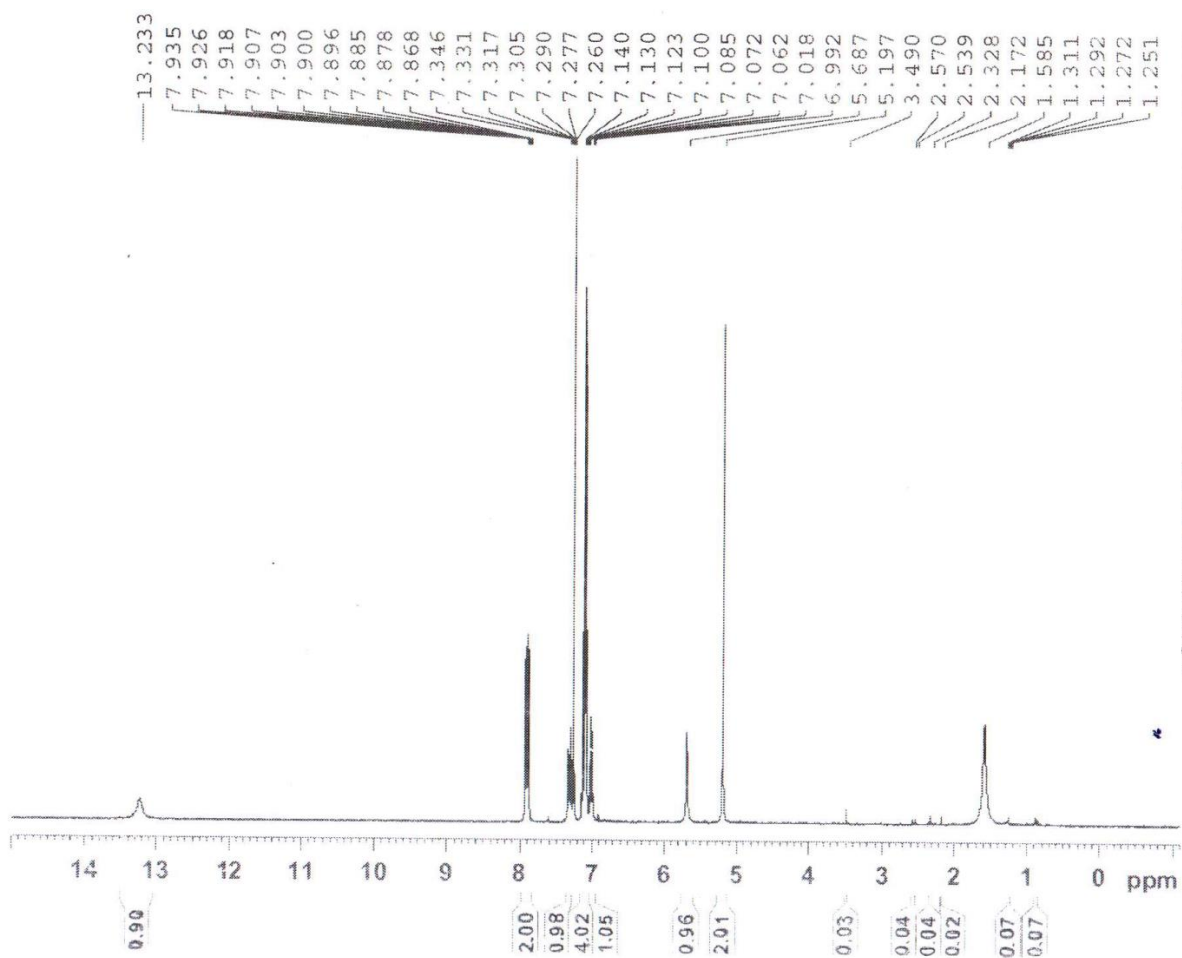

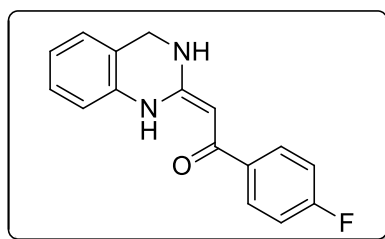

4a

$^{13}\text{C}$  NMR in  $\text{CDCl}_3$  (100MHz)

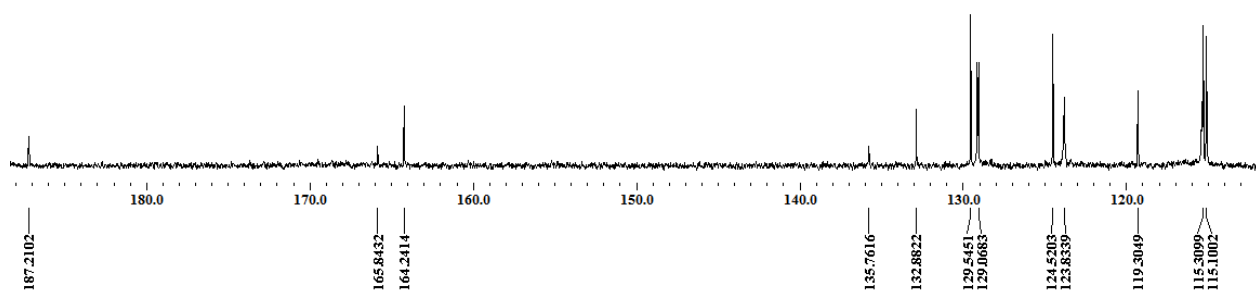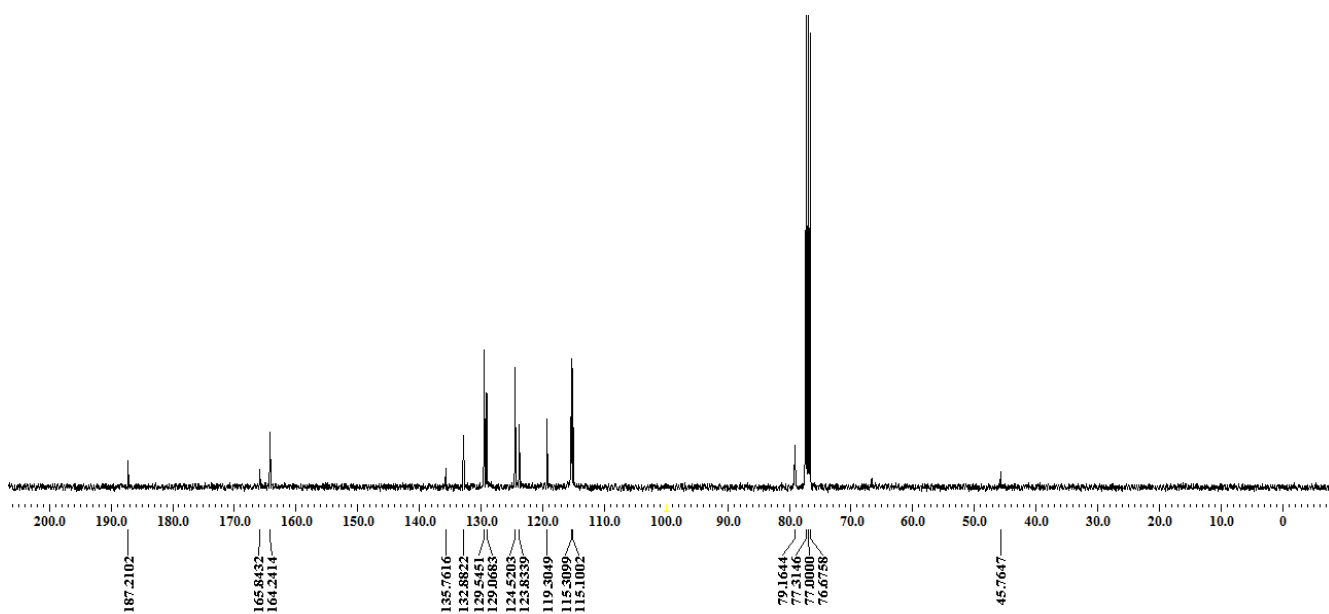

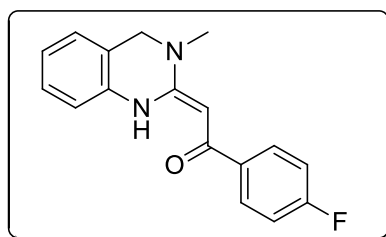

4b

<sup>1</sup>H-NMR in DMSO-d<sub>6</sub> (400MHz)

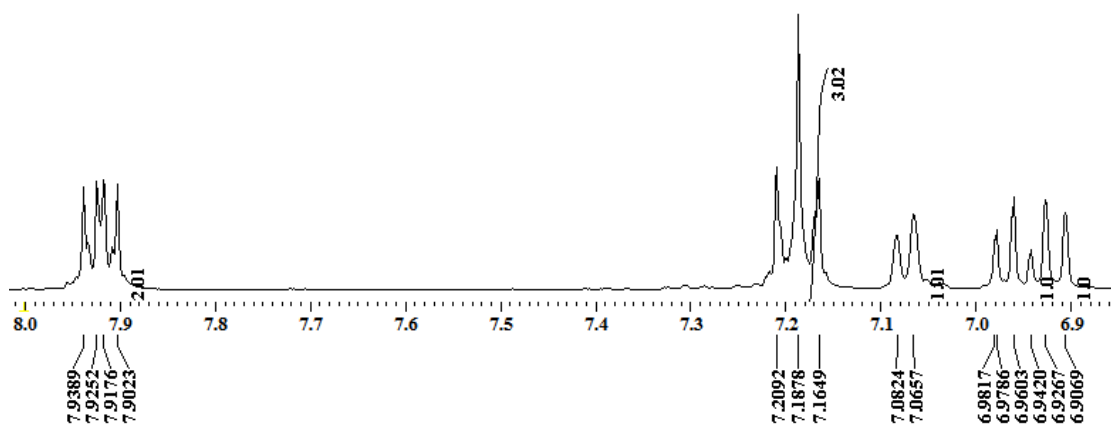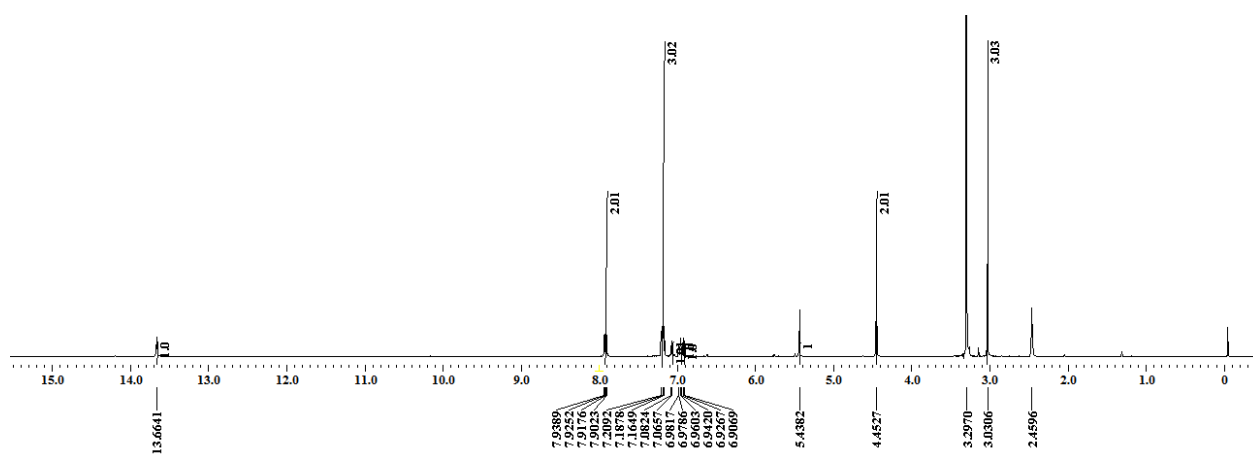

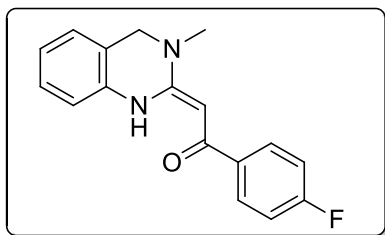

4b

$^{13}\text{C}$  NMR in  $\text{CDCl}_3$  (100MHz)

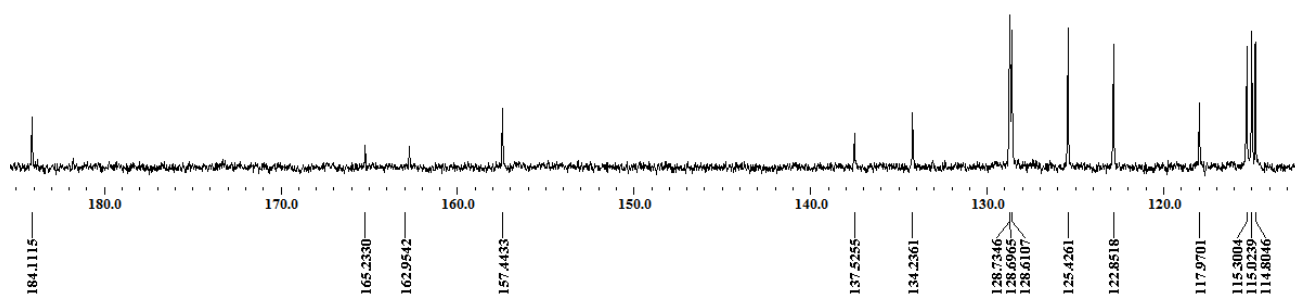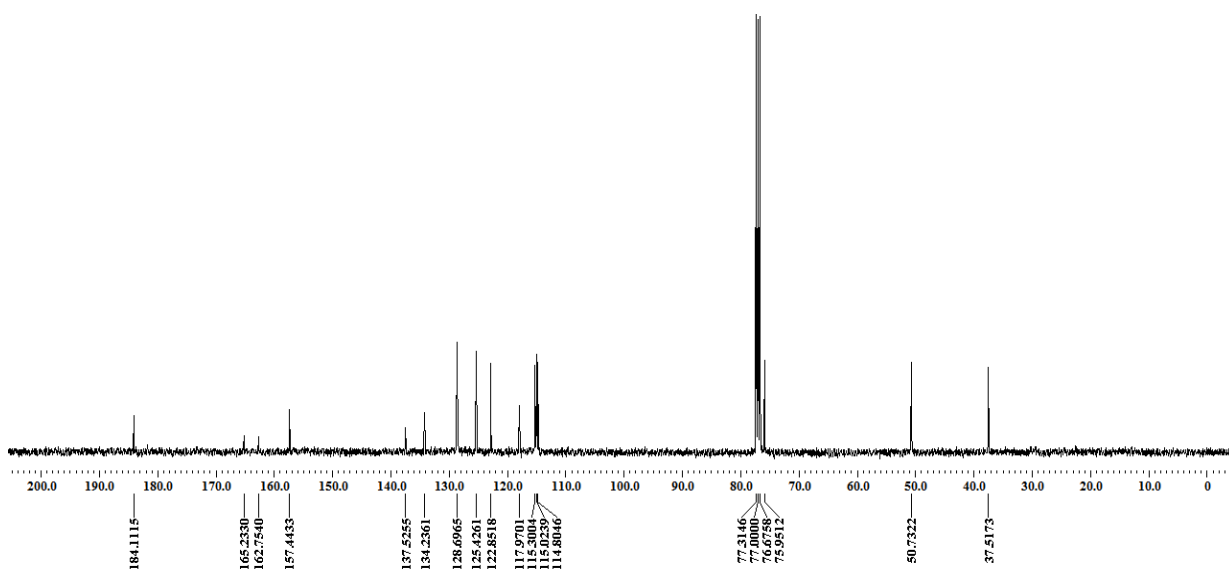

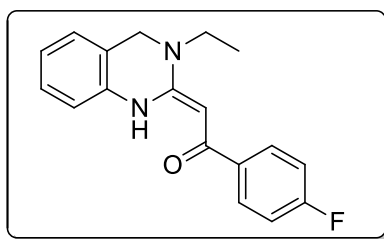

4c

$^1\text{H-NMR}$  in  $\text{CDCl}_3$  (400MHz)

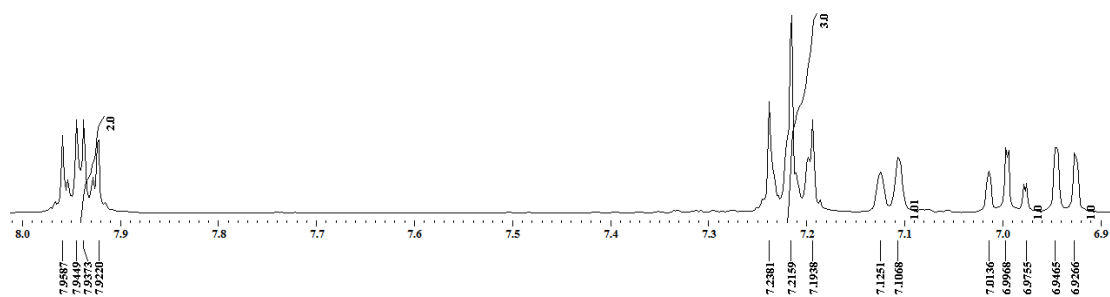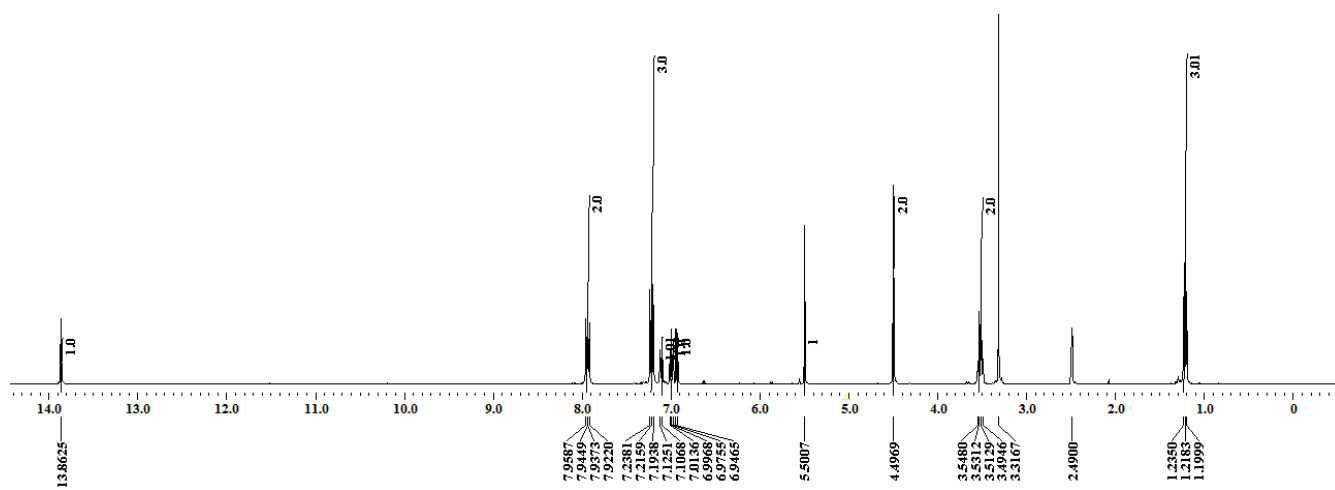

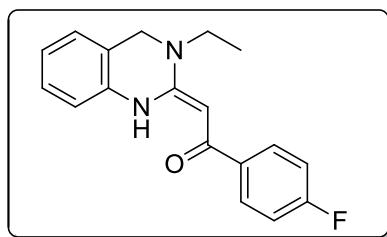

4c

$^{13}\text{C}$ -NMR in  $\text{CDCl}_3$  (100MHz)

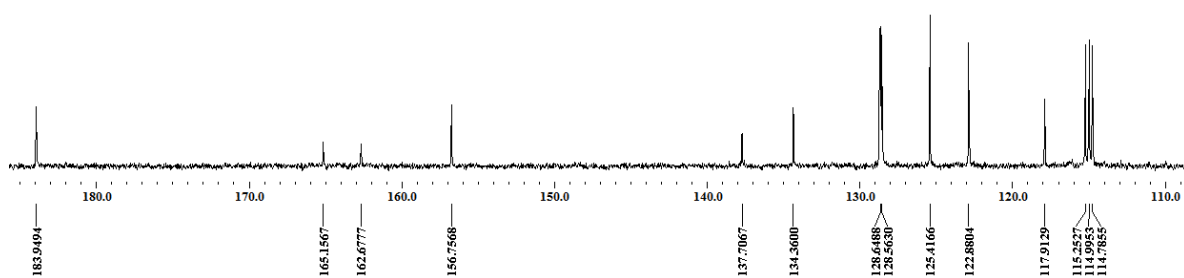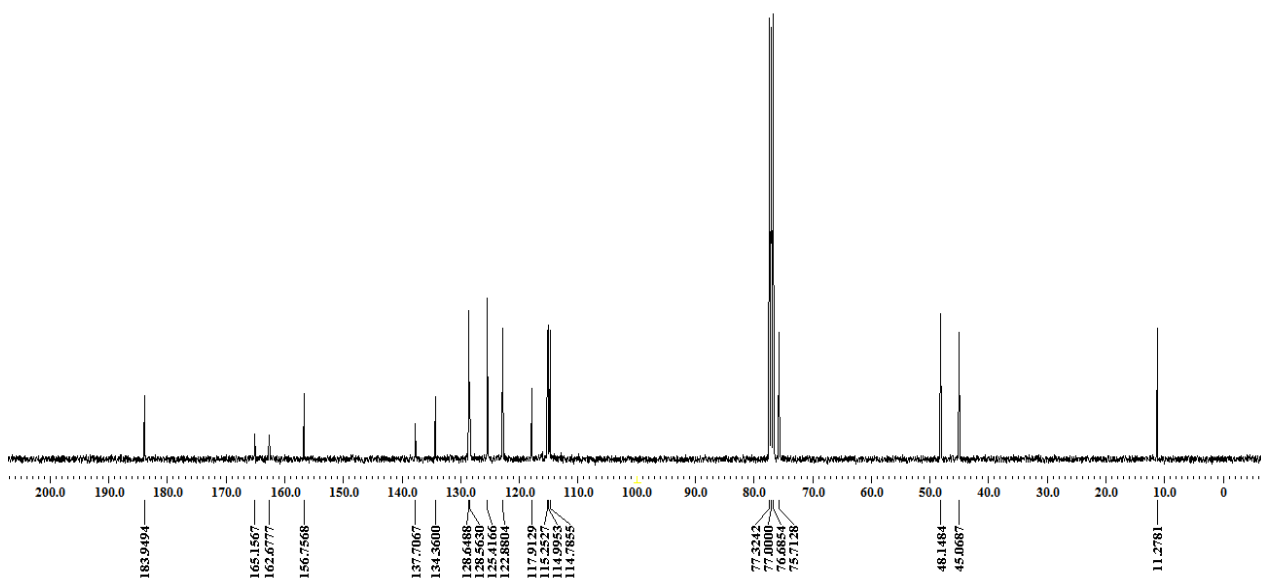



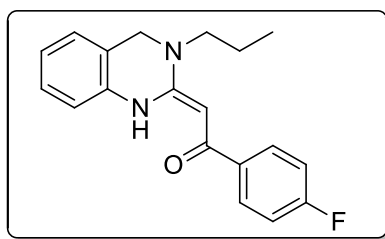

4d

$^1\text{H-NMR}$  in  $\text{CDCl}_3$  (400MHz)

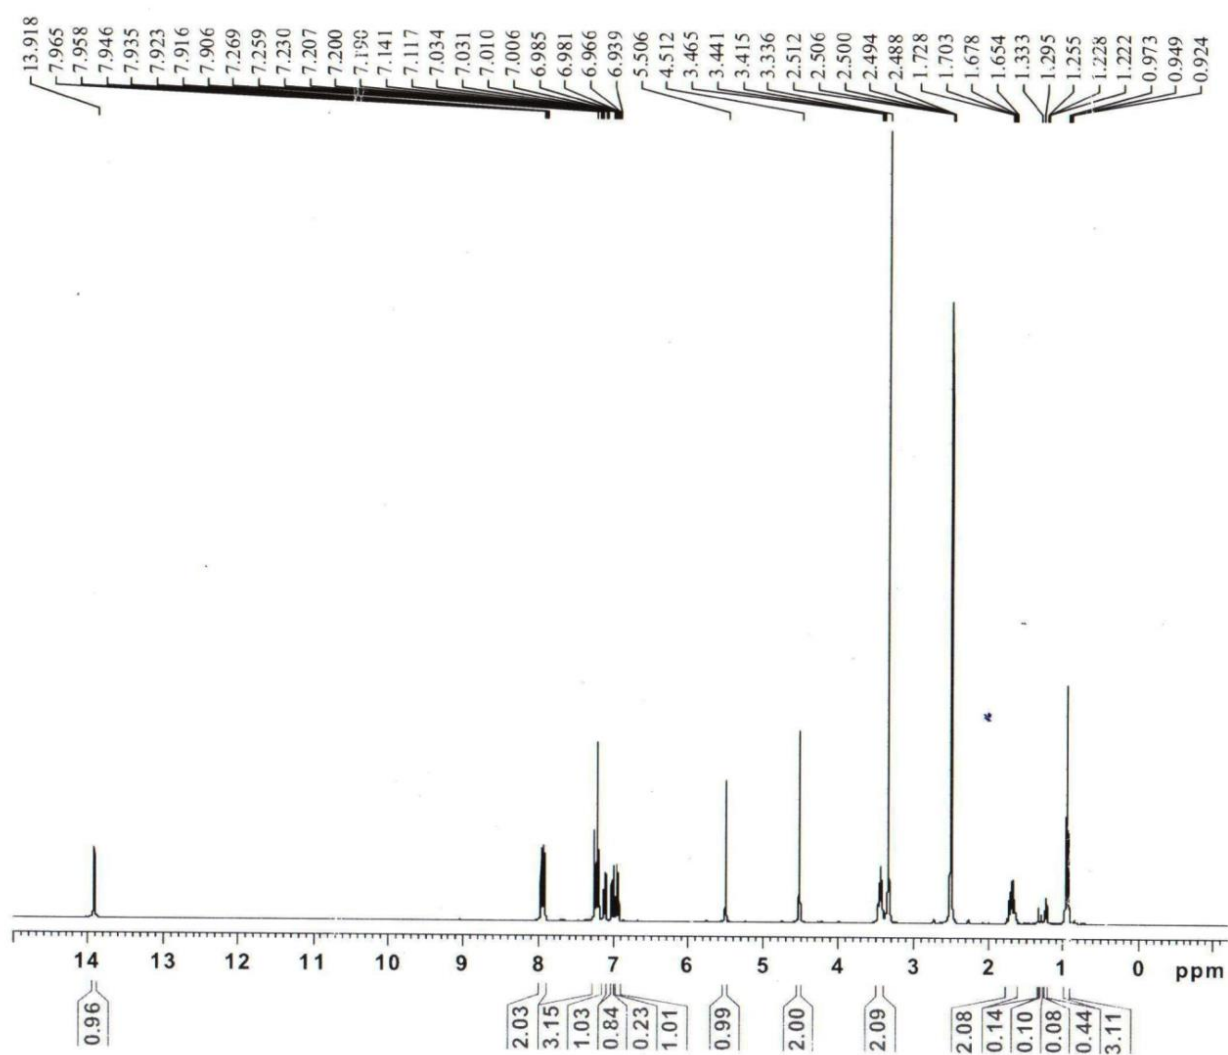

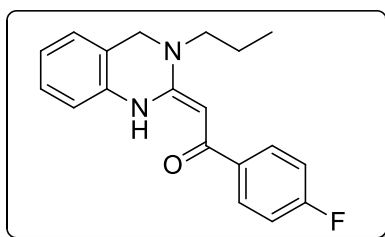

4d

$^{13}\text{C-NMR}$  in  $\text{CDCl}_3$  (100MHz)

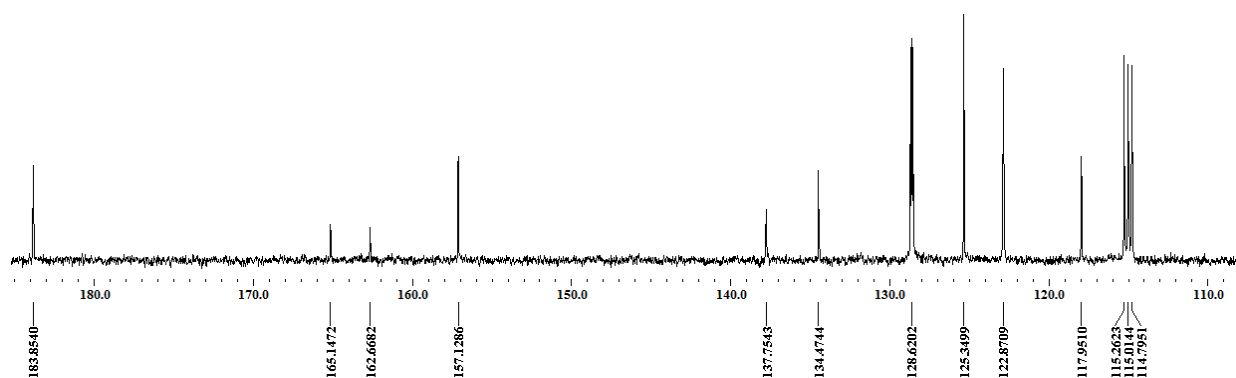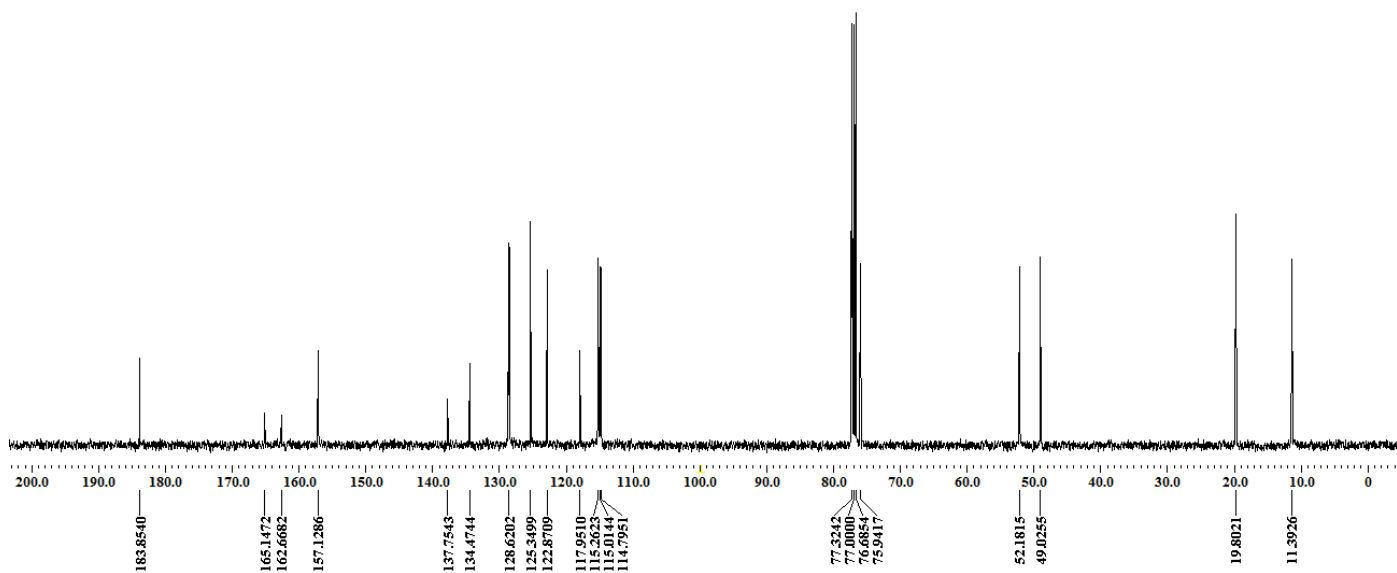

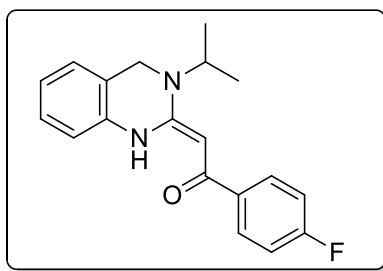

4e

$^1\text{H-NMR}$  in  $\text{CDCl}_3$  (400MHz)

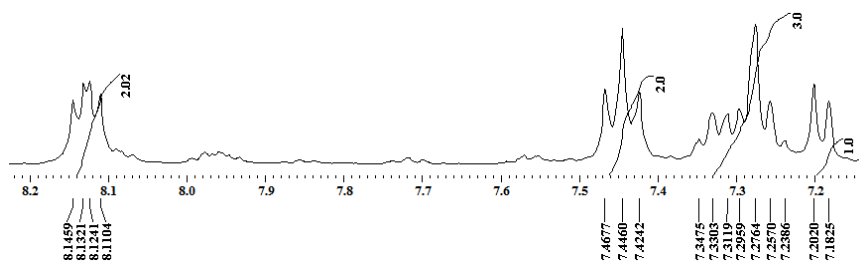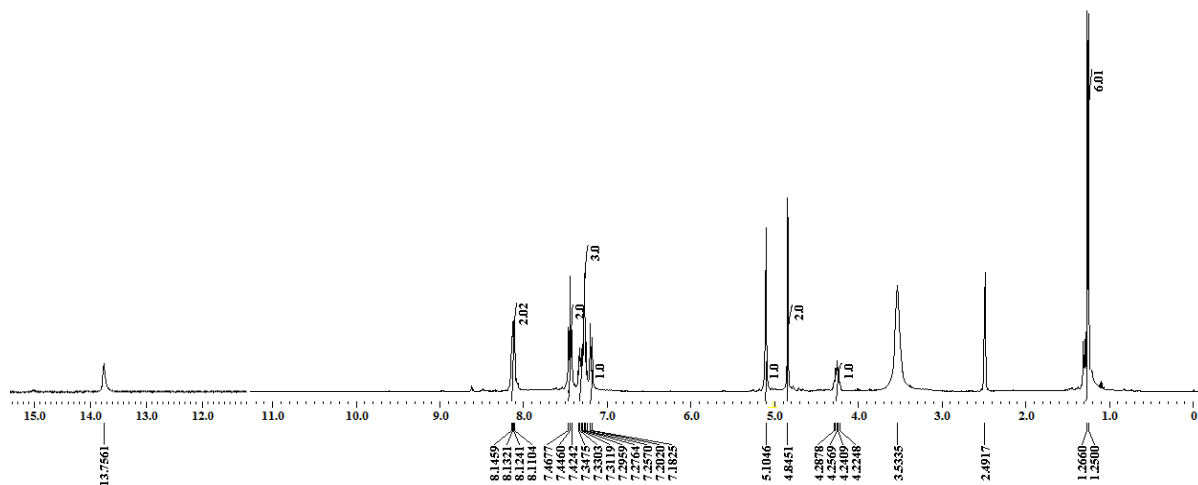

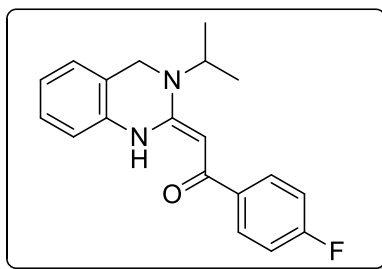

4e

$^{13}\text{C-NMR}$  in  $\text{CDCl}_3$  (100MHz)

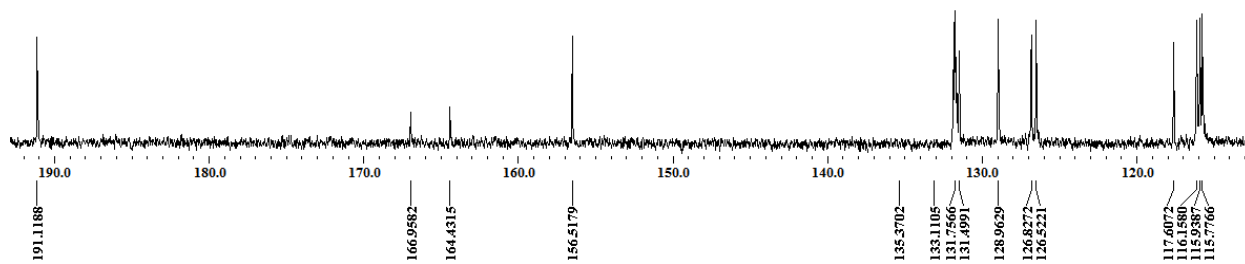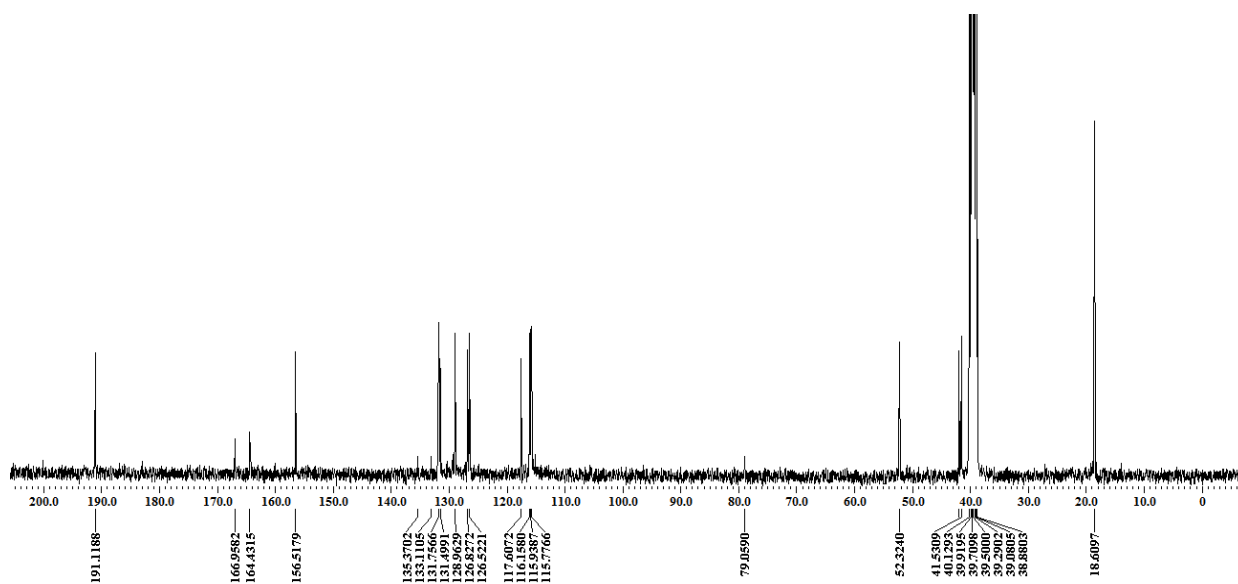

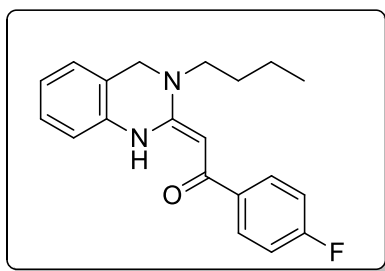

4f

<sup>1</sup>H-NMR in DMSO-d<sub>6</sub> (400MHz)

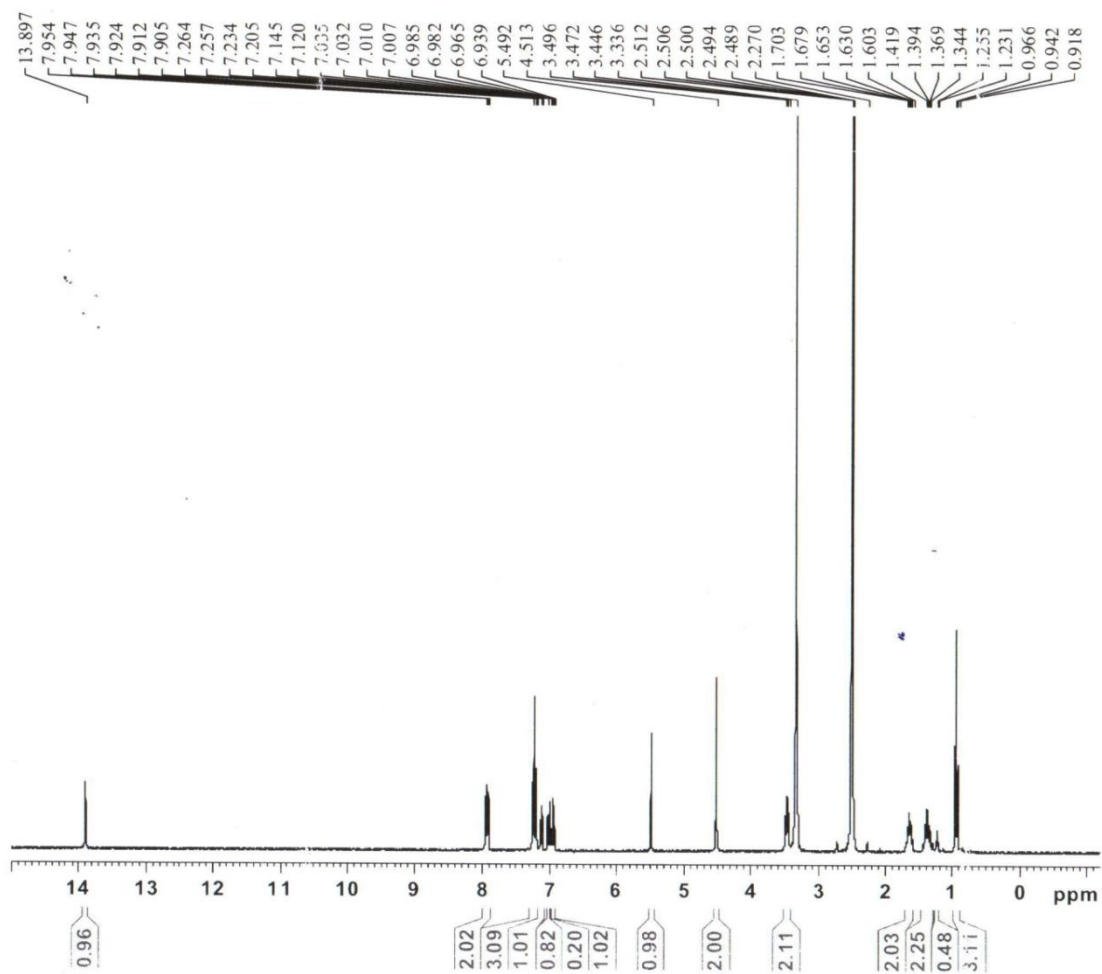

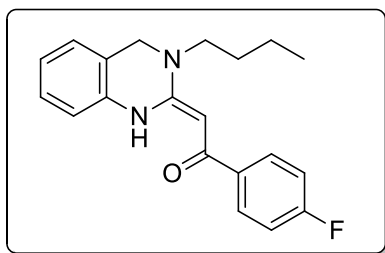

4f

$^{13}\text{C-NMR}$  in  $\text{CDCl}_3$  (100MHz)

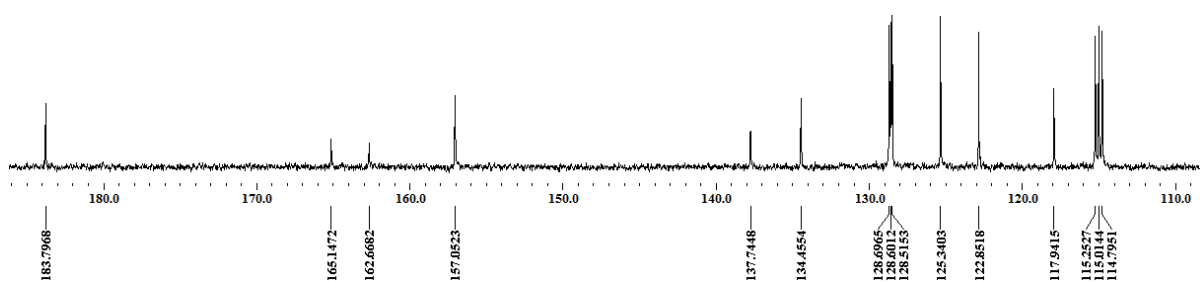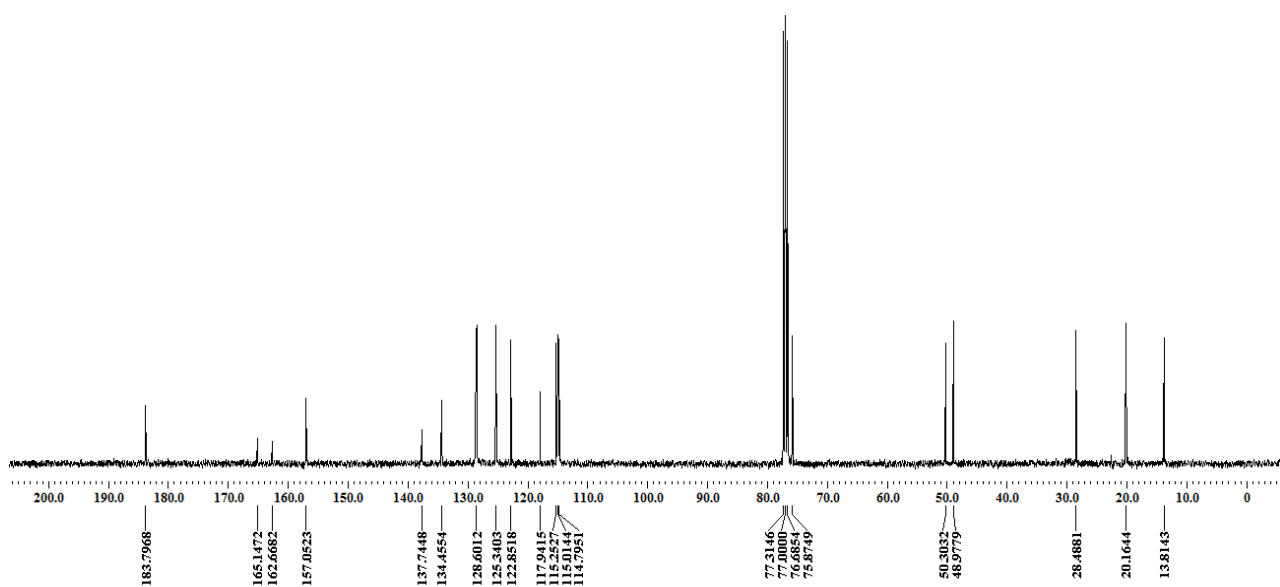

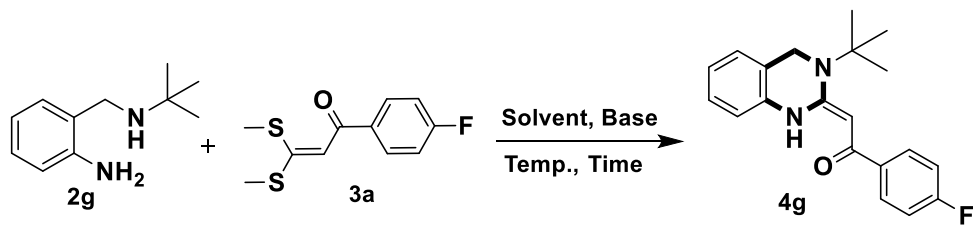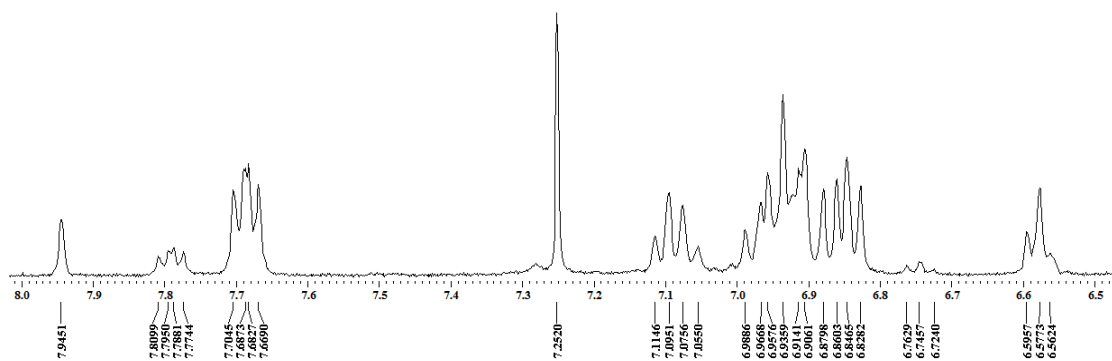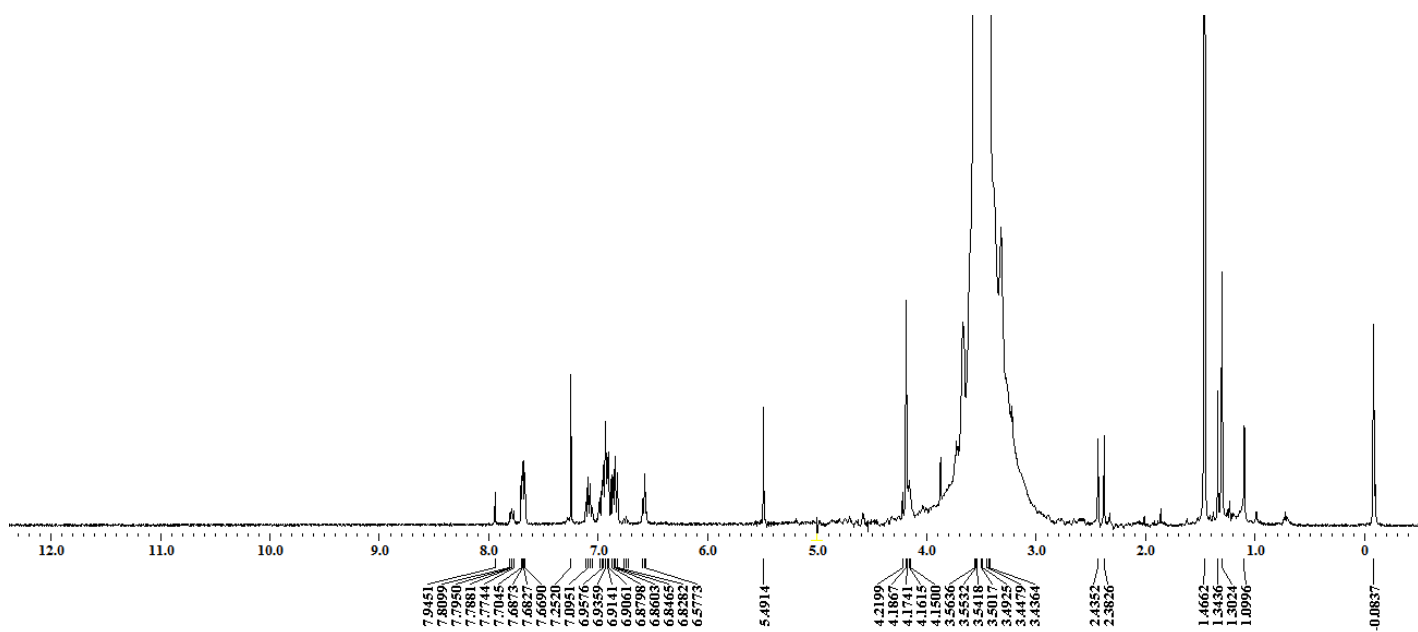

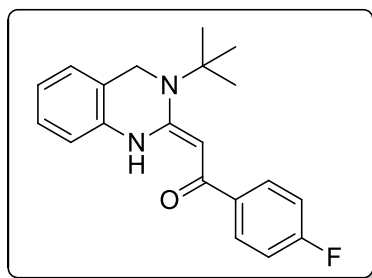

4g

<sup>1</sup>H-NMR in CDCl<sub>3</sub> (400MHz)

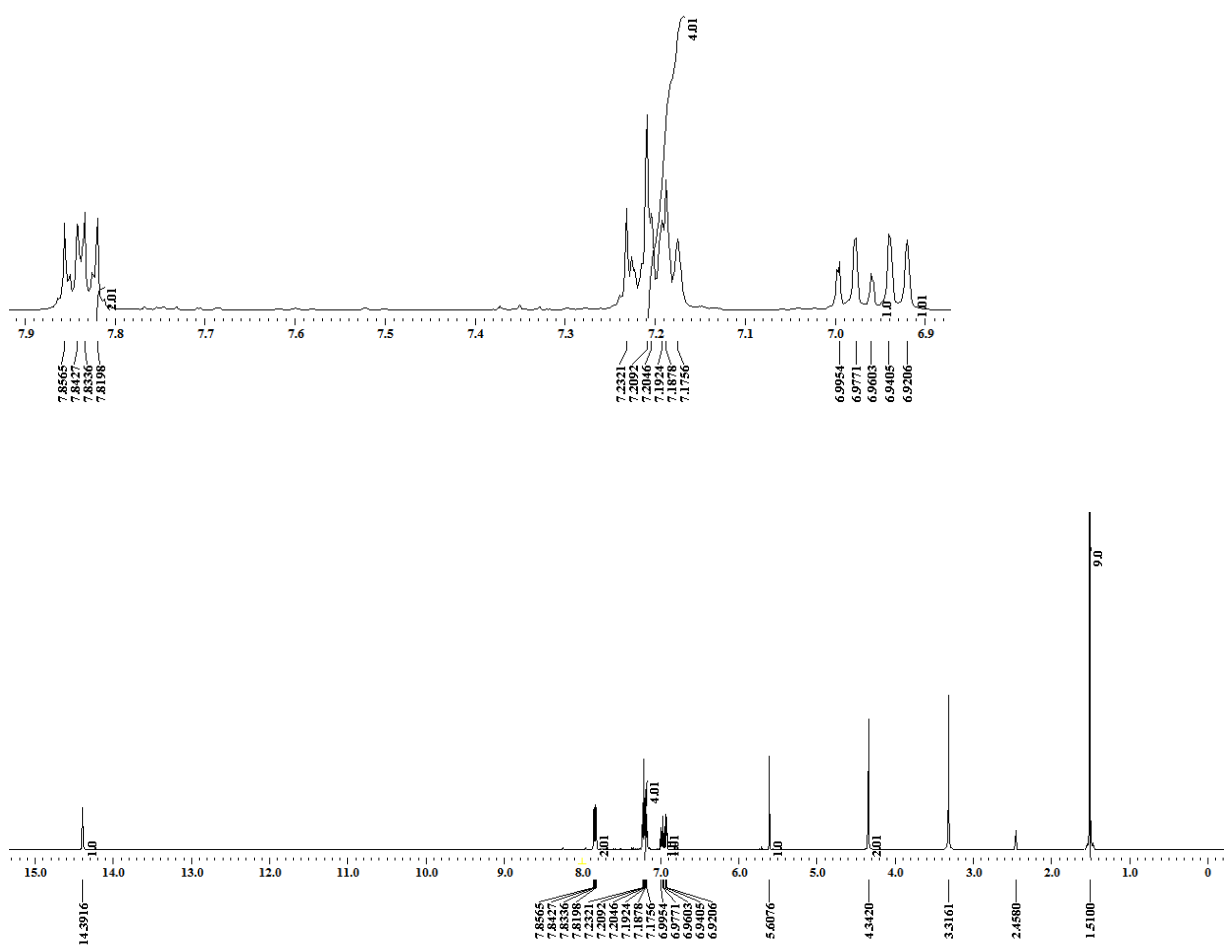



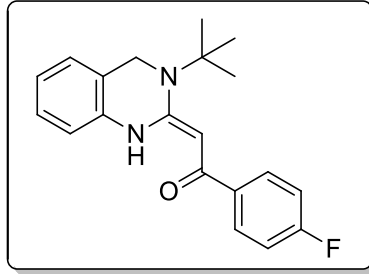

4g

$^{13}\text{C-NMR}$  in  $\text{CDCl}_3$  (100MHz)

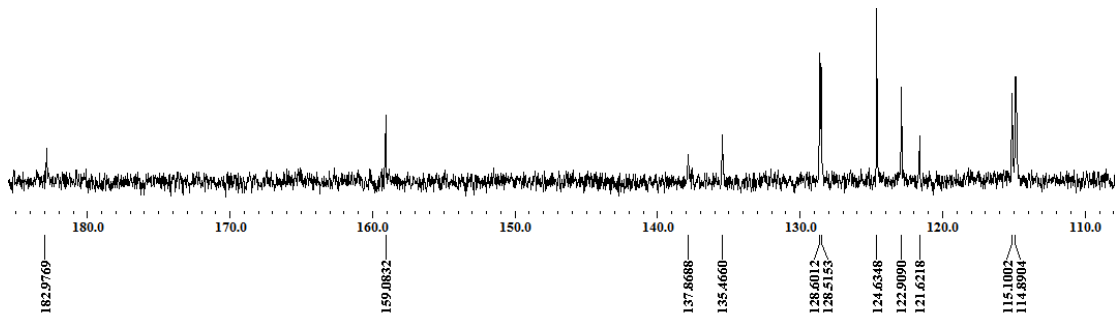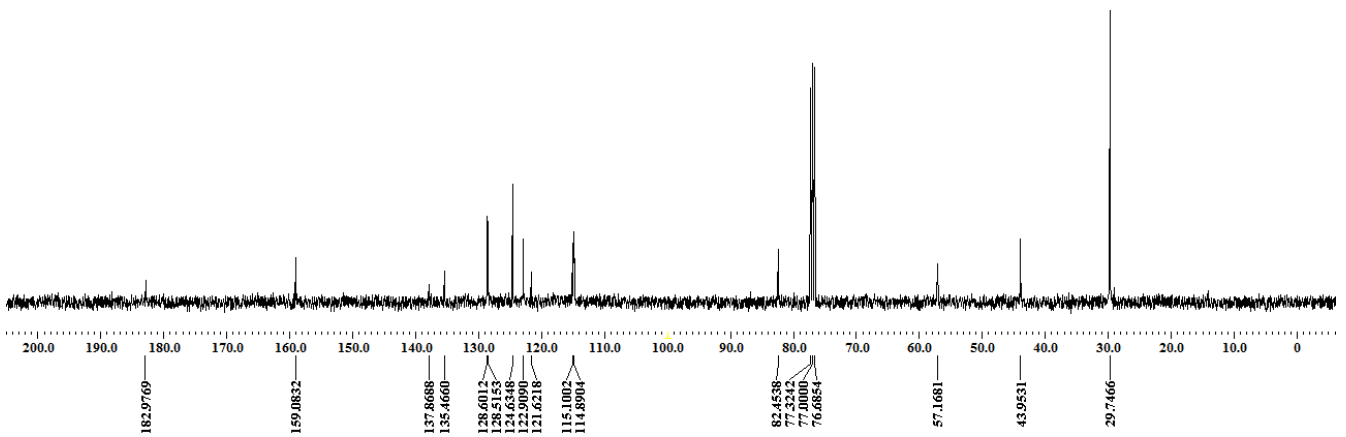

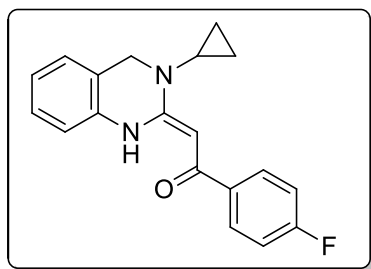

4h

<sup>1</sup>H-NMR in DMSO-d<sub>6</sub> (400MHz)

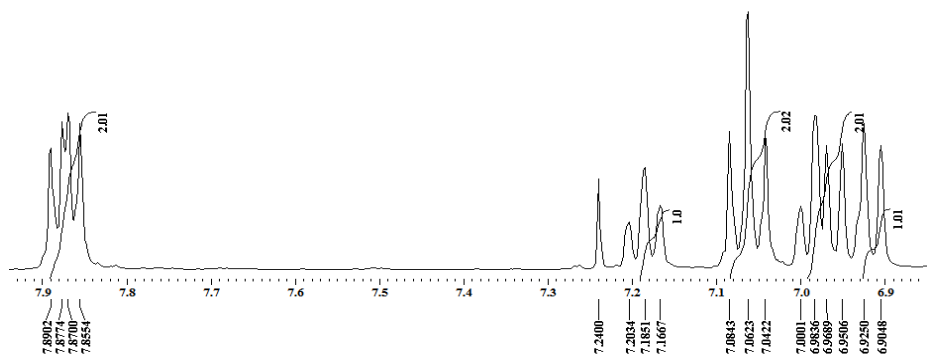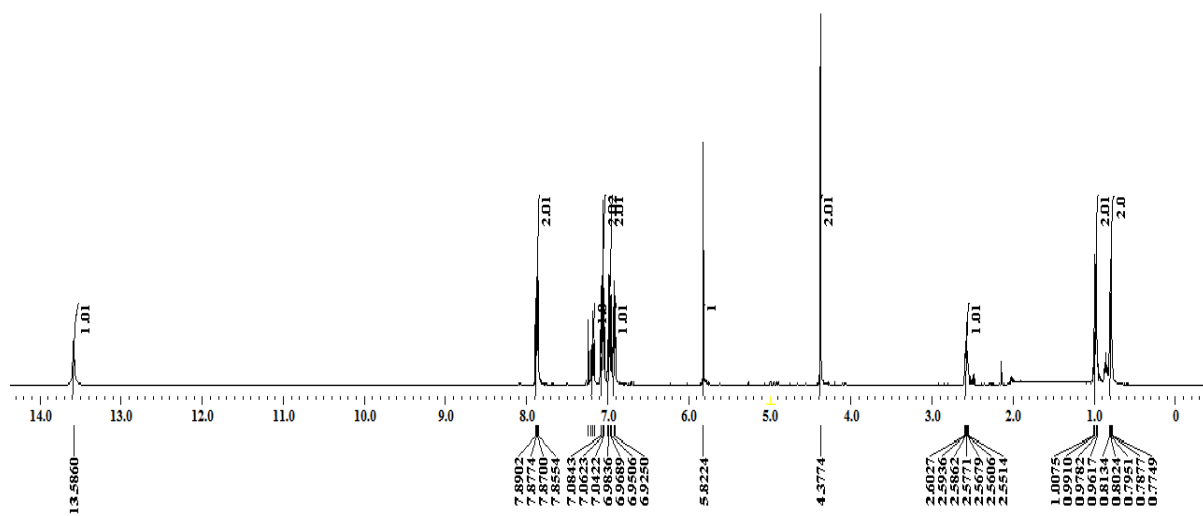

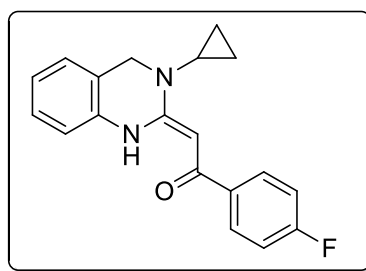

4h

$^{13}\text{C-NMR}$  in  $\text{CDCl}_3$  (100MHz)

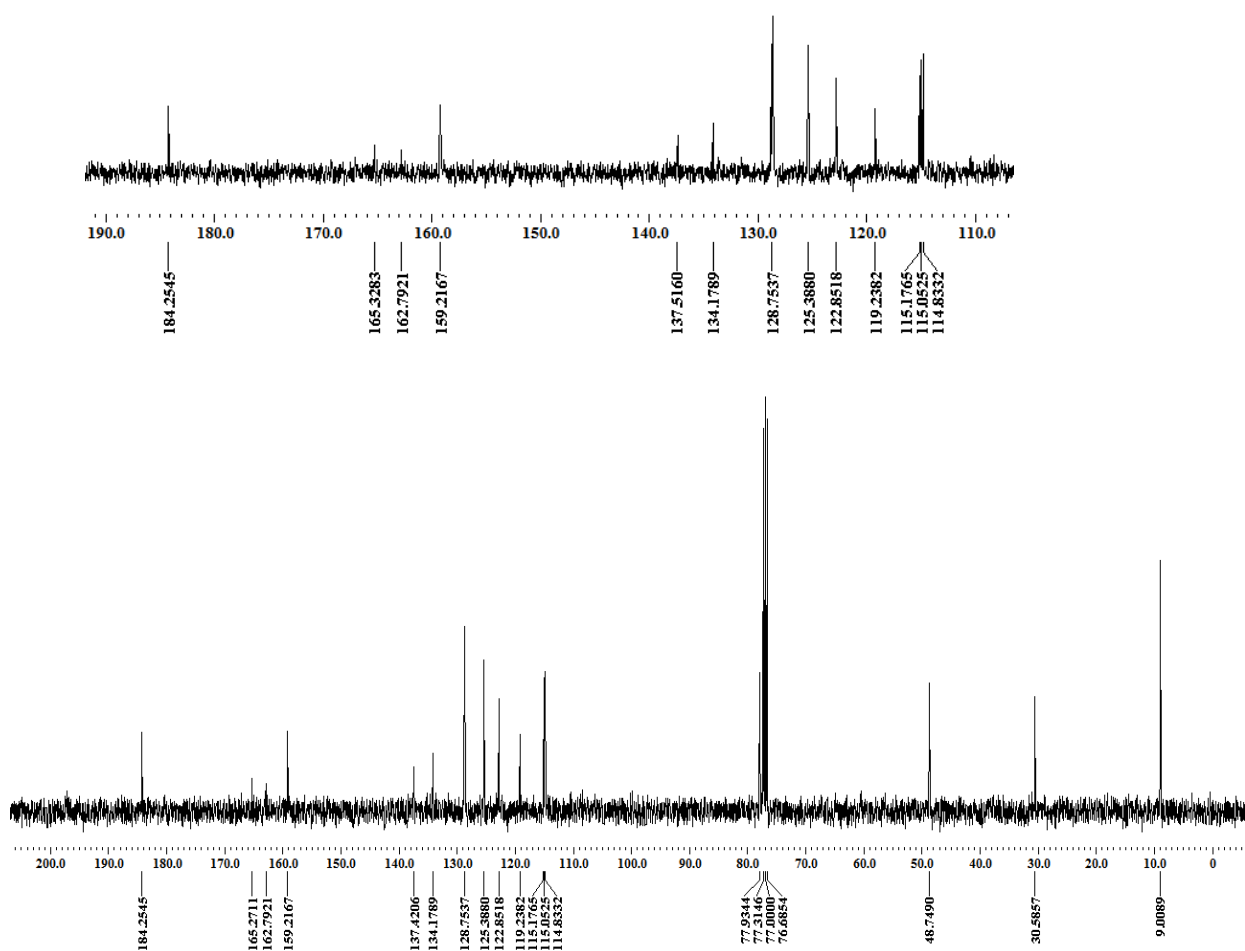

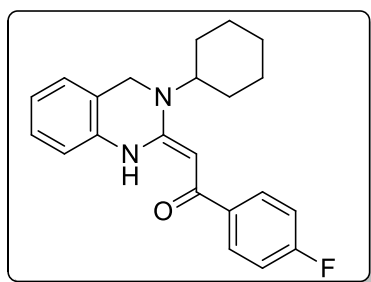

4i

$^1\text{H-NMR}$  in  $\text{CDCl}_3$  (400MHz)

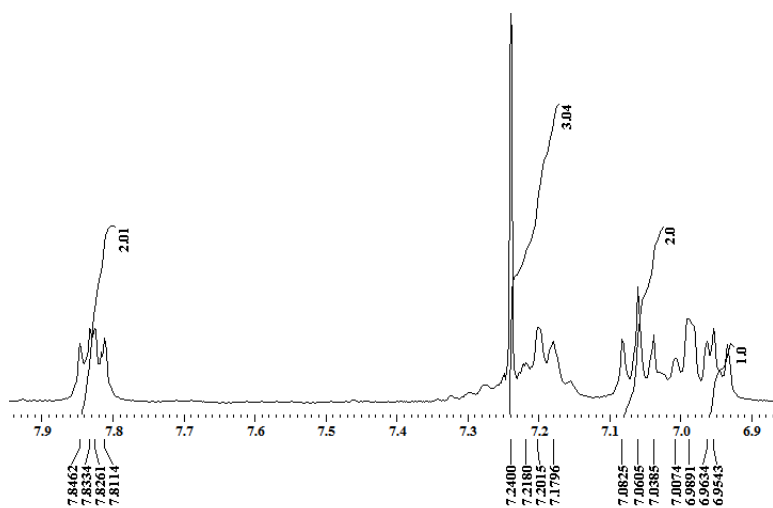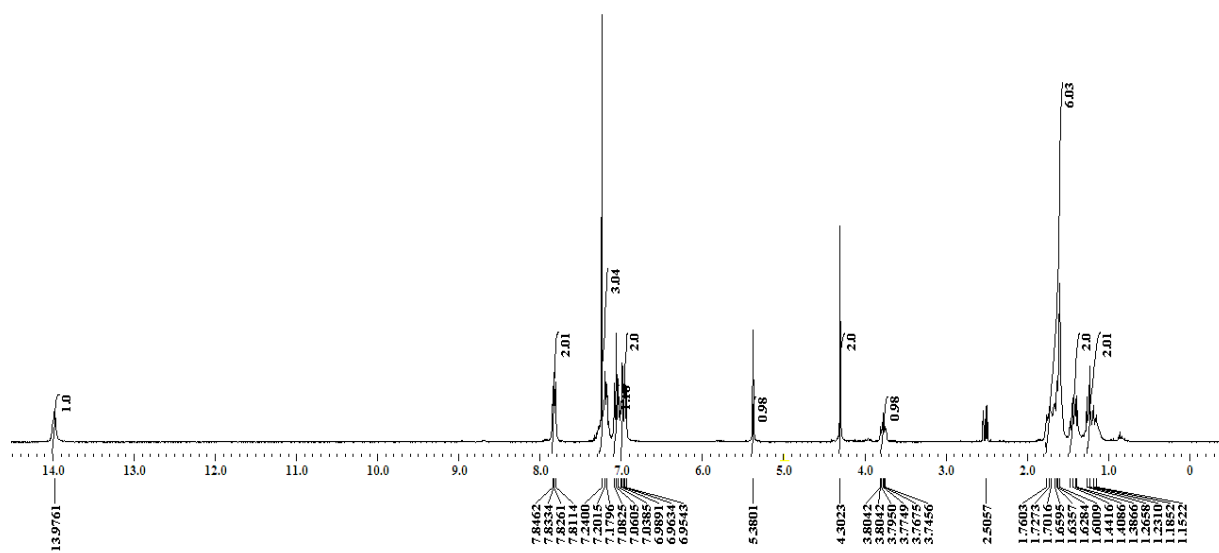

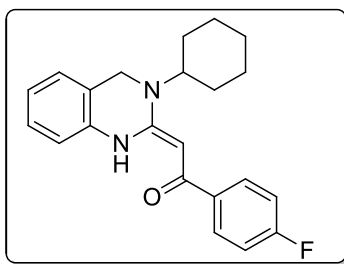

4i

<sup>13</sup>C-NMR in CDCl<sub>3</sub> (100MHz)

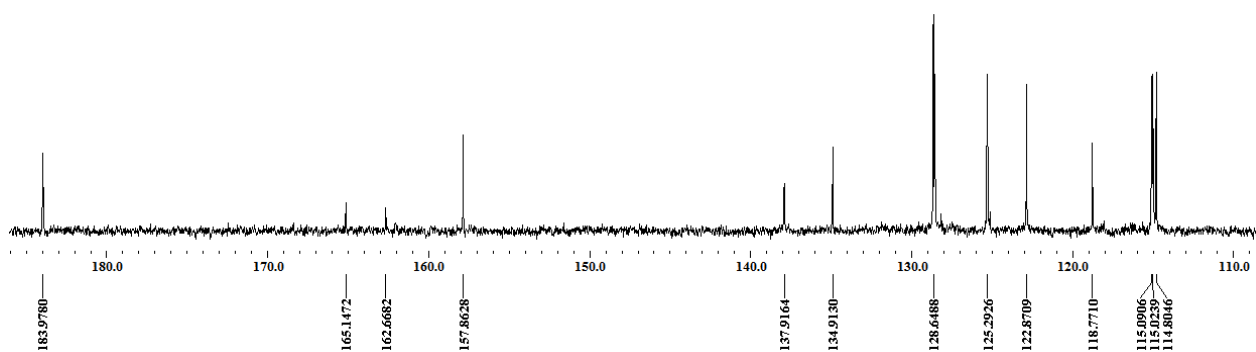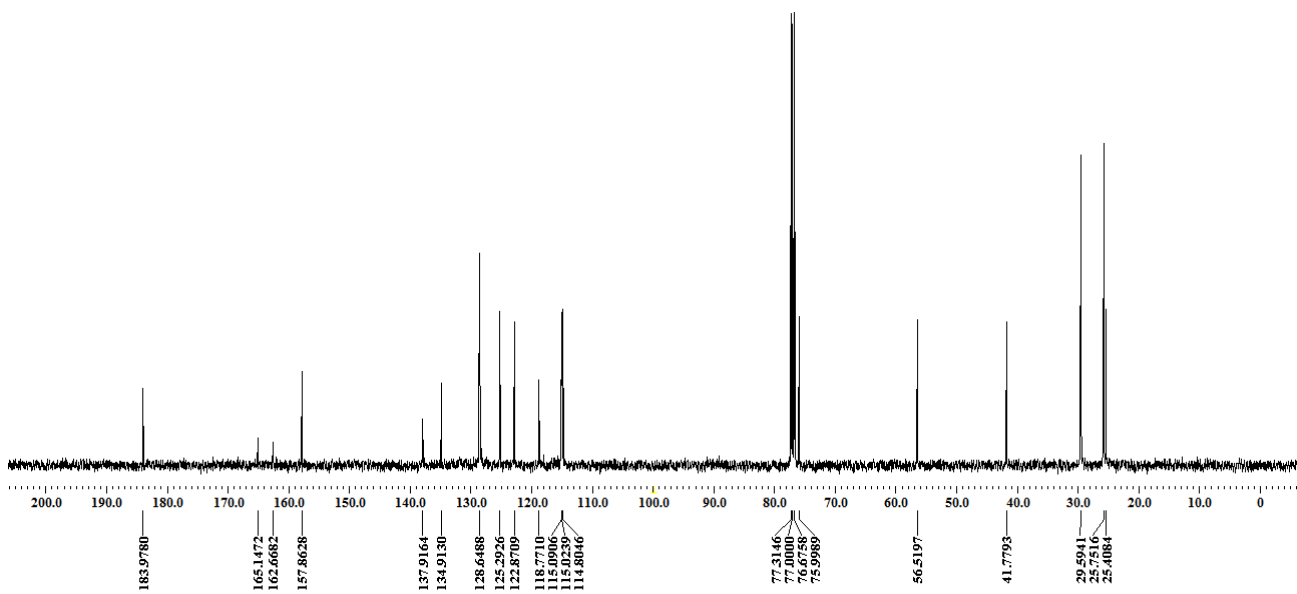

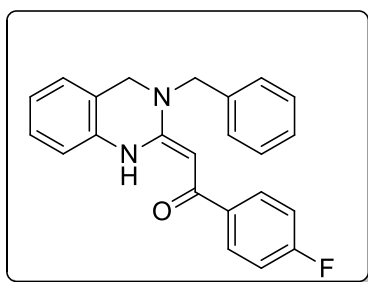

4j

<sup>1</sup>H-NMR in CDCl<sub>3</sub> (400MHz)

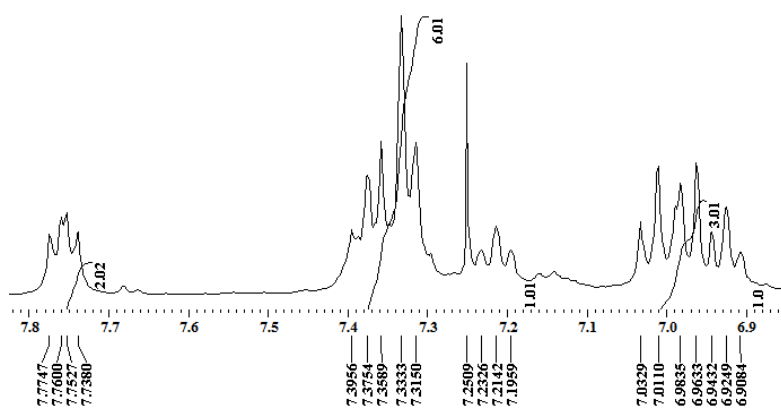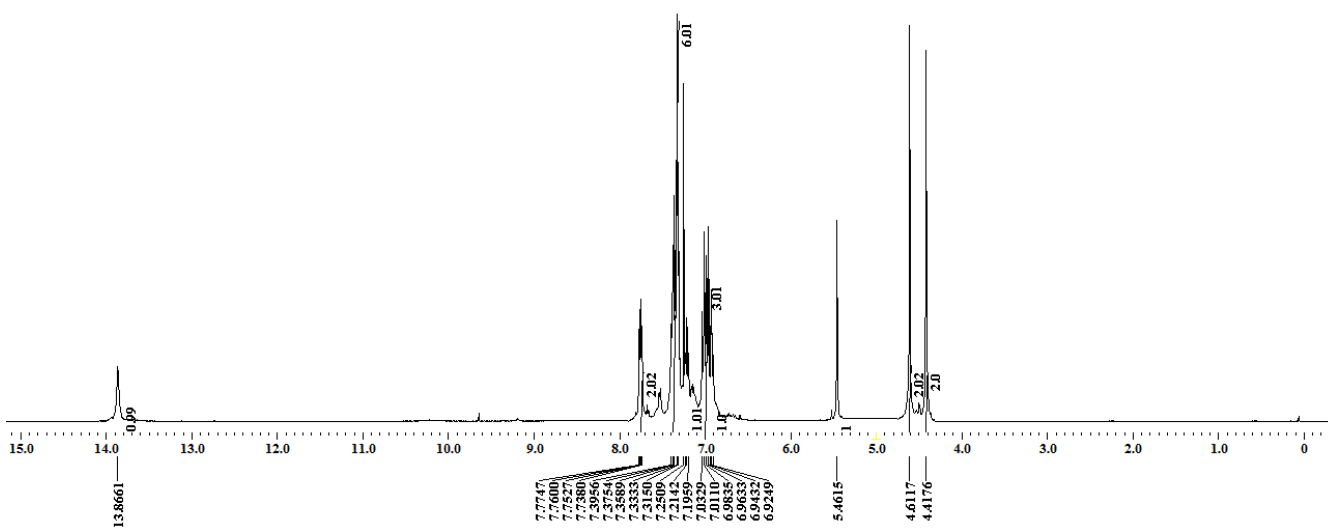

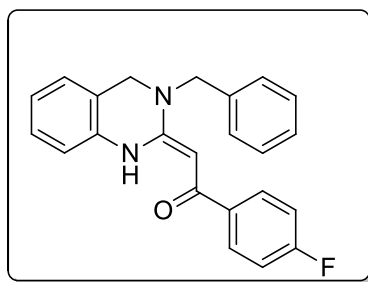

4j

$^{13}\text{C-NMR}$  in  $\text{CDCl}_3$  (100MHz)

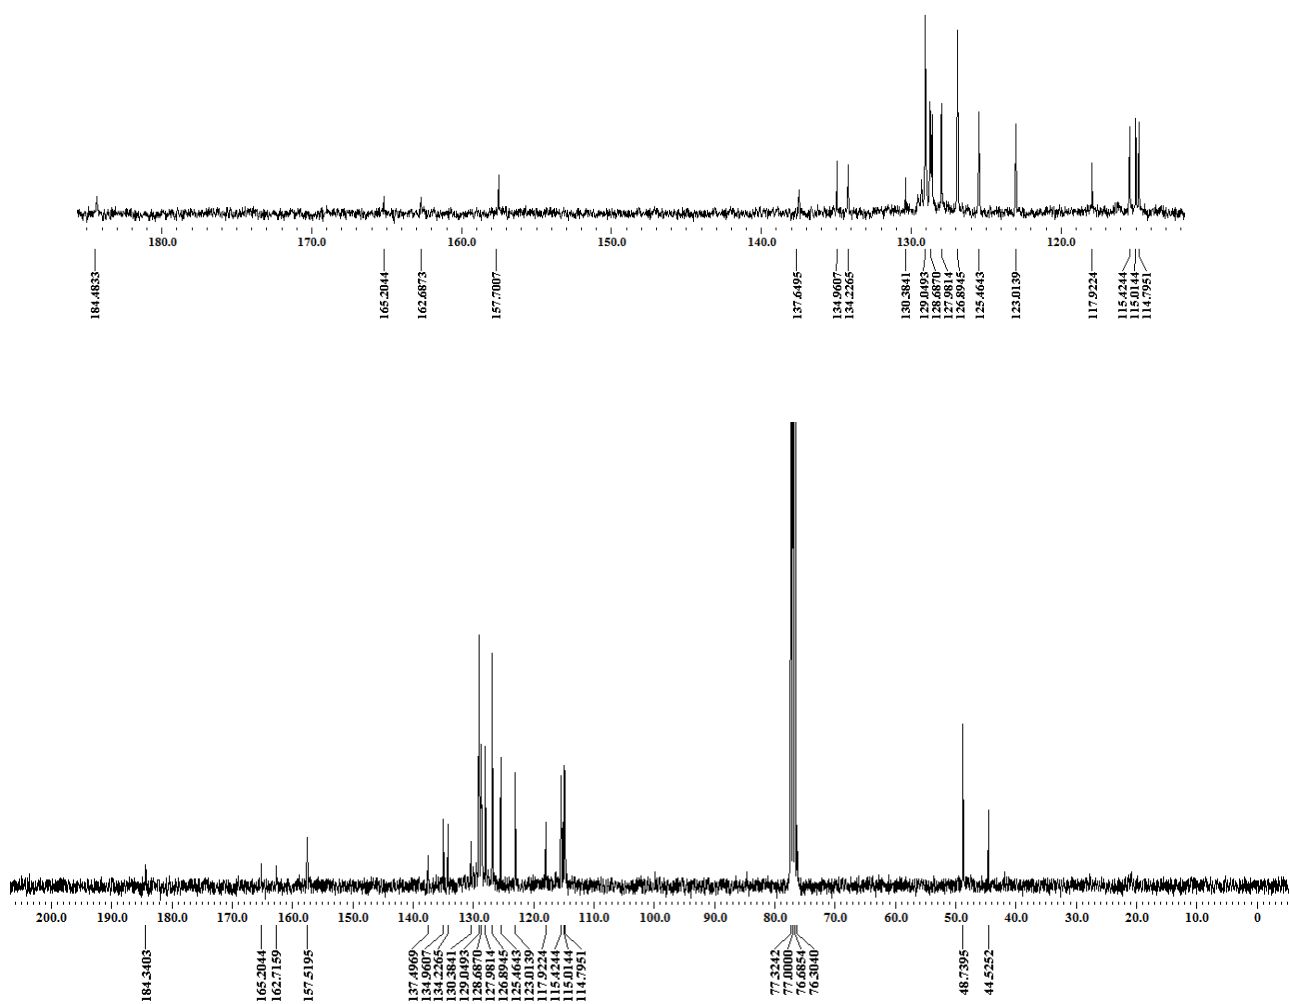

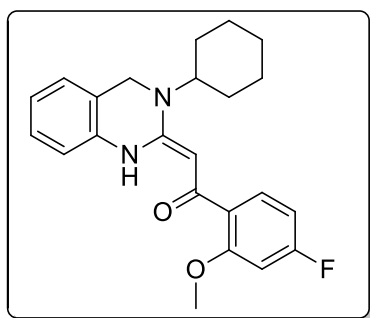

4k

$^1\text{H-NMR}$  in  $\text{CDCl}_3$  (400MHz)

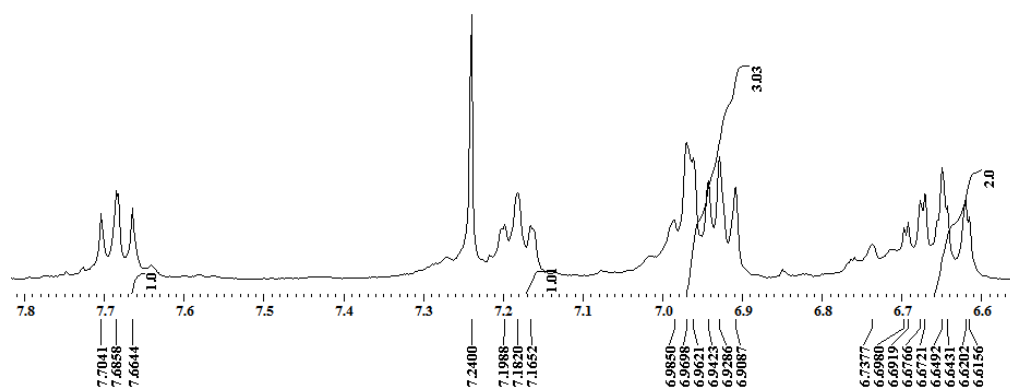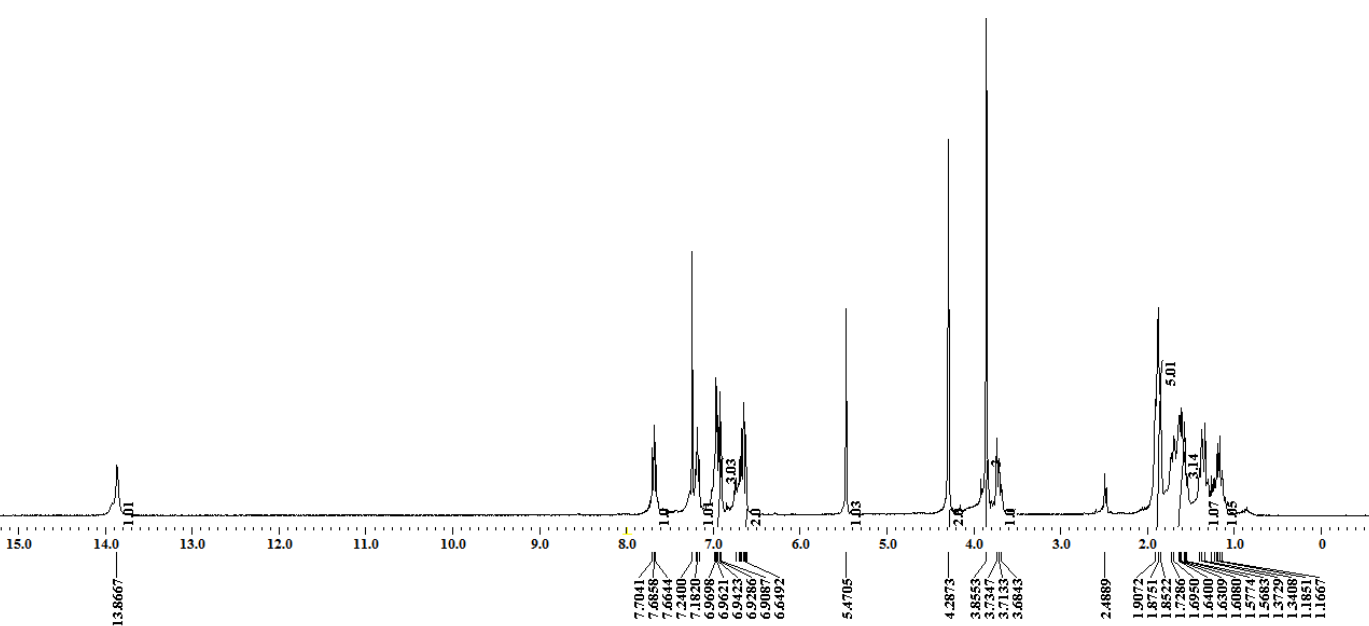



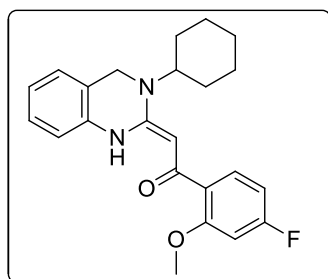

4k

$^{13}\text{C-NMR}$  in  $\text{CDCl}_3$  (100MHz)

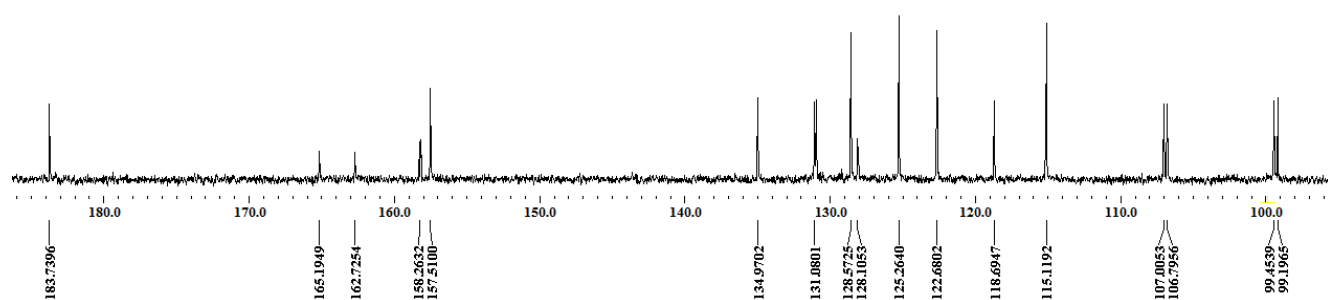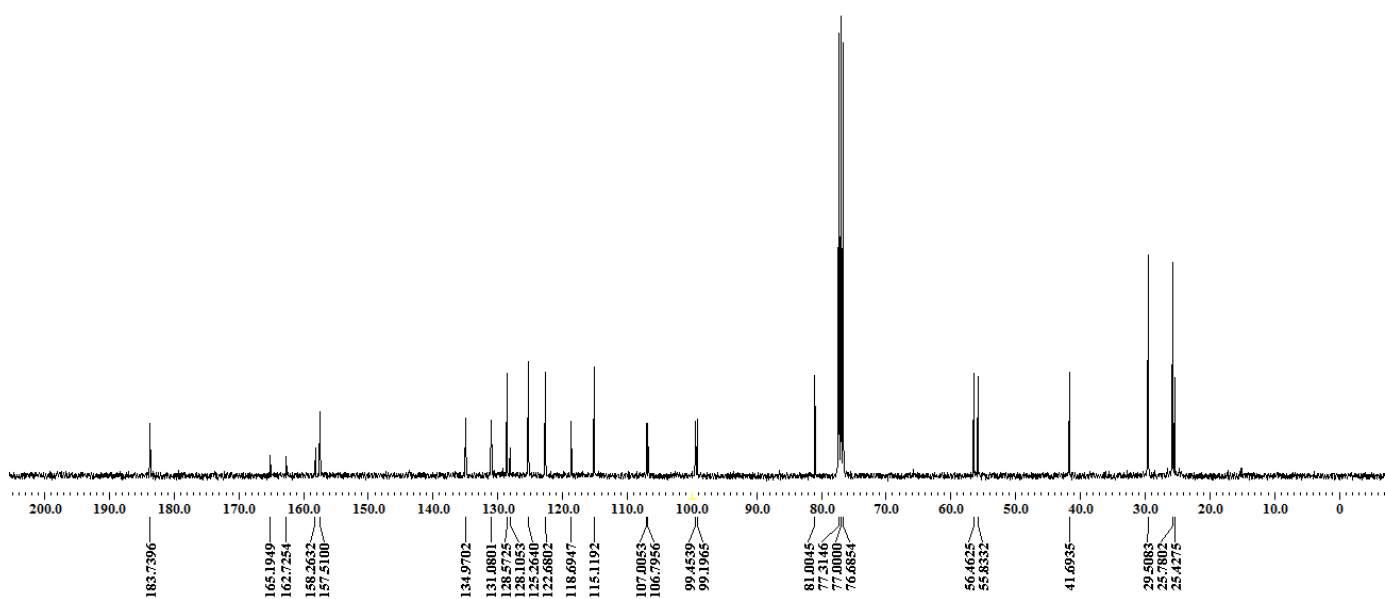

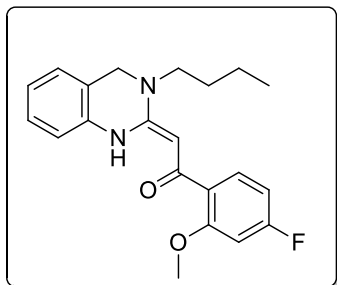

4I

$^1\text{H-NMR}$  in  $\text{CDCl}_3$  (400MHz)

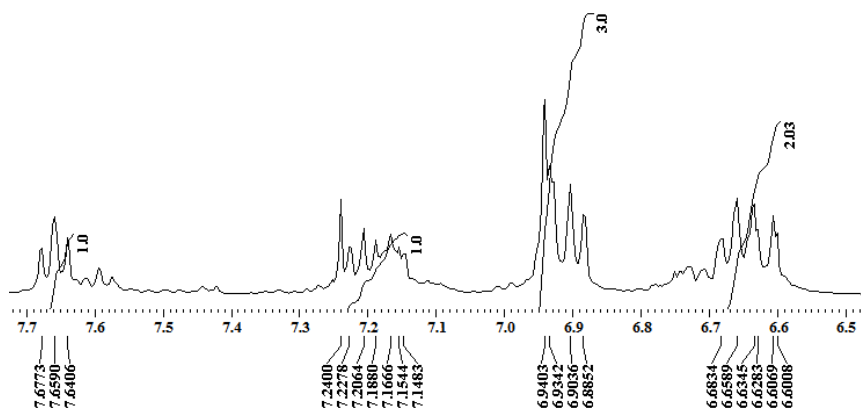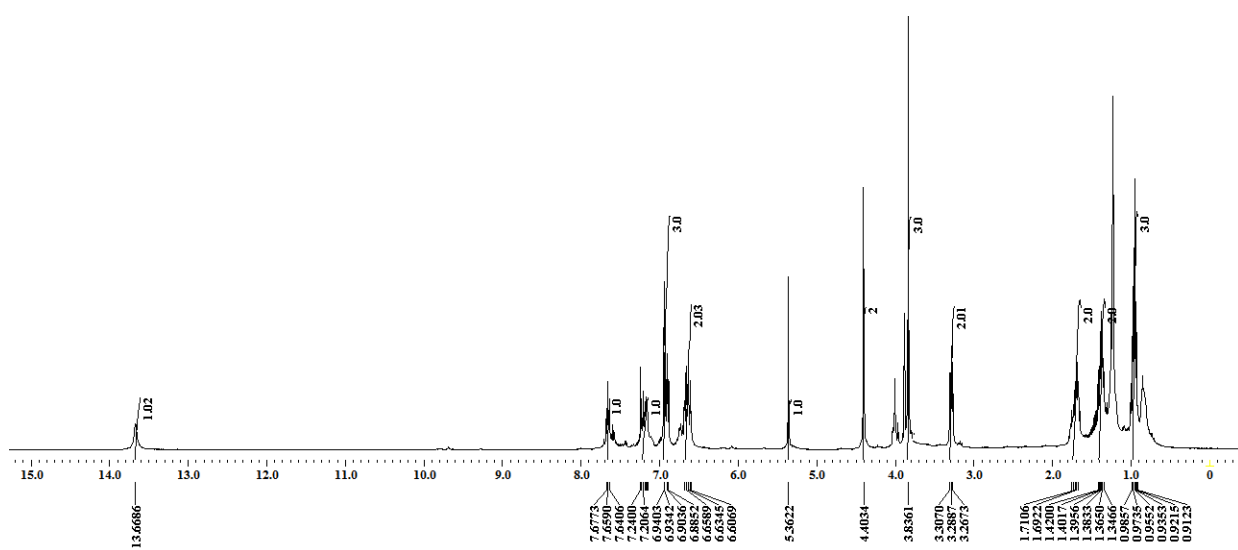

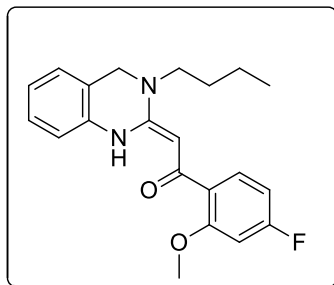

41

$^{13}\text{C-NMR}$  in  $\text{CDCl}_3$  (100MHz)

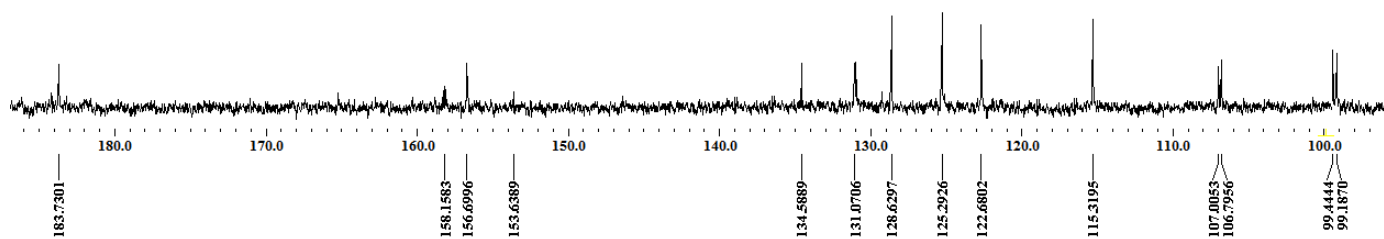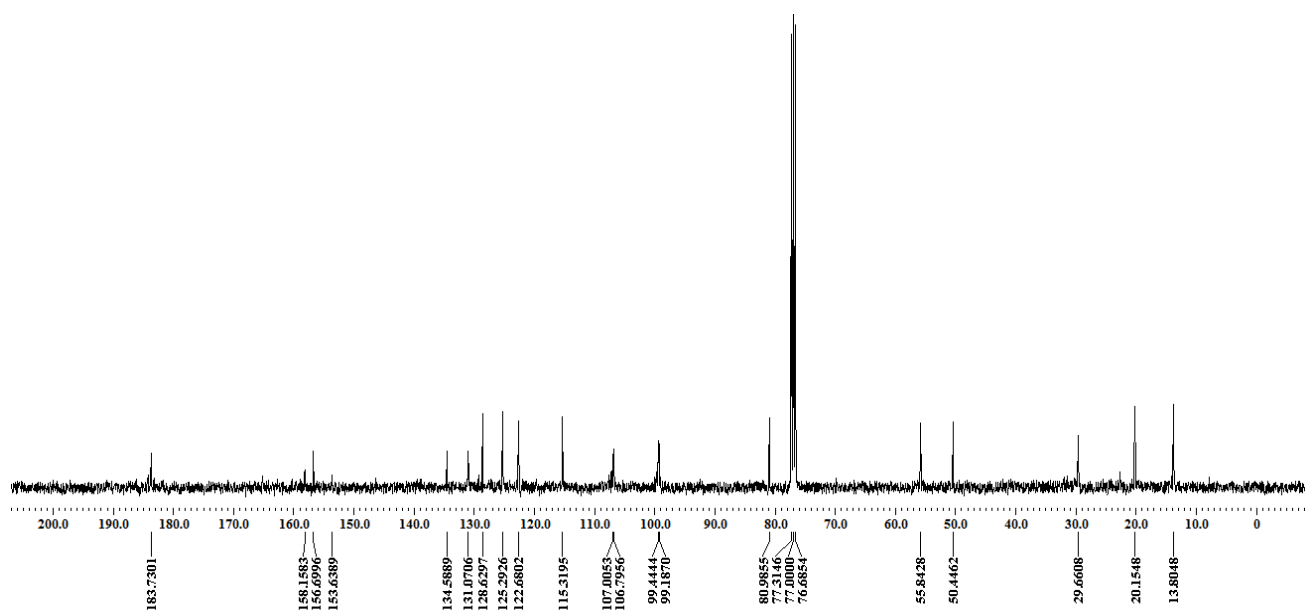

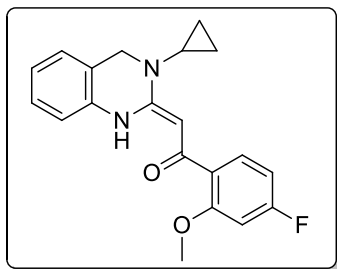

4m

$^1\text{H-NMR}$  in  $\text{CDCl}_3$  (400MHz)

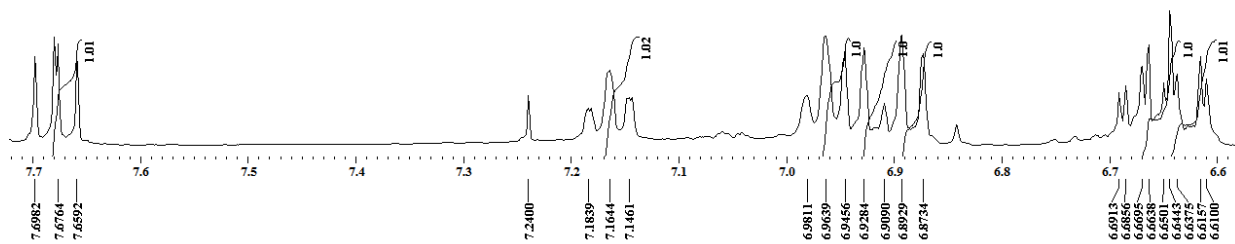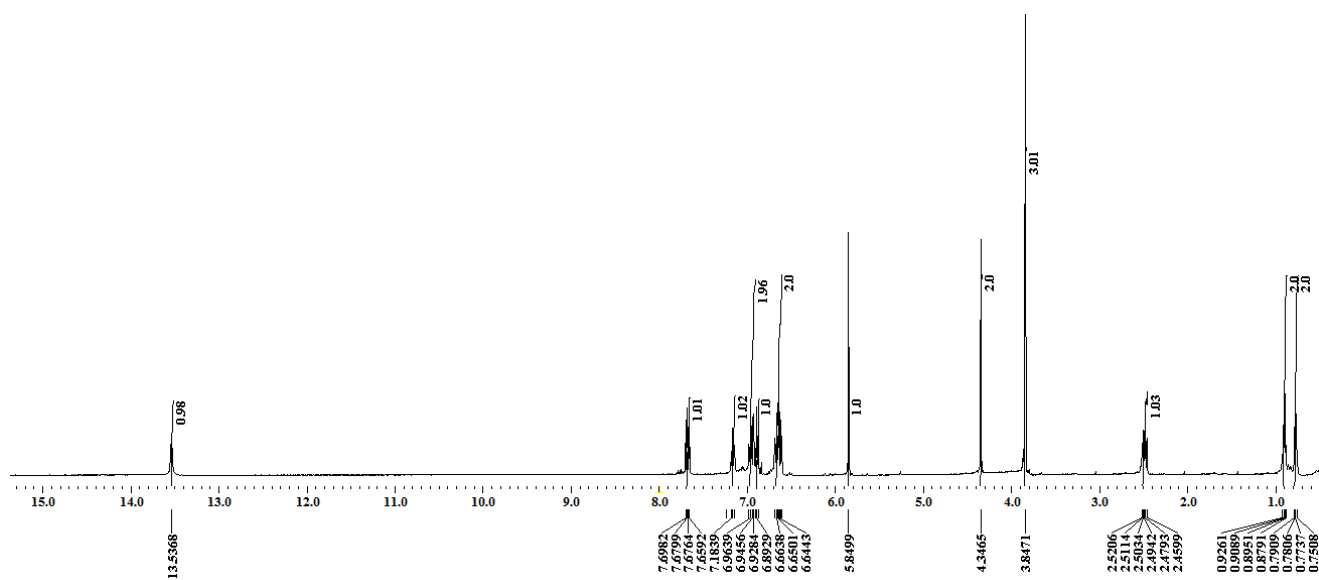

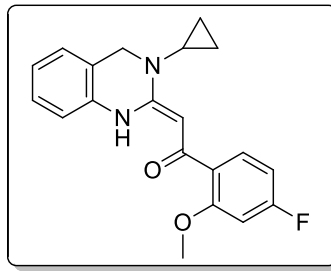

4m

$^{13}\text{C-NMR}$  in  $\text{CDCl}_3$  (100MHz)

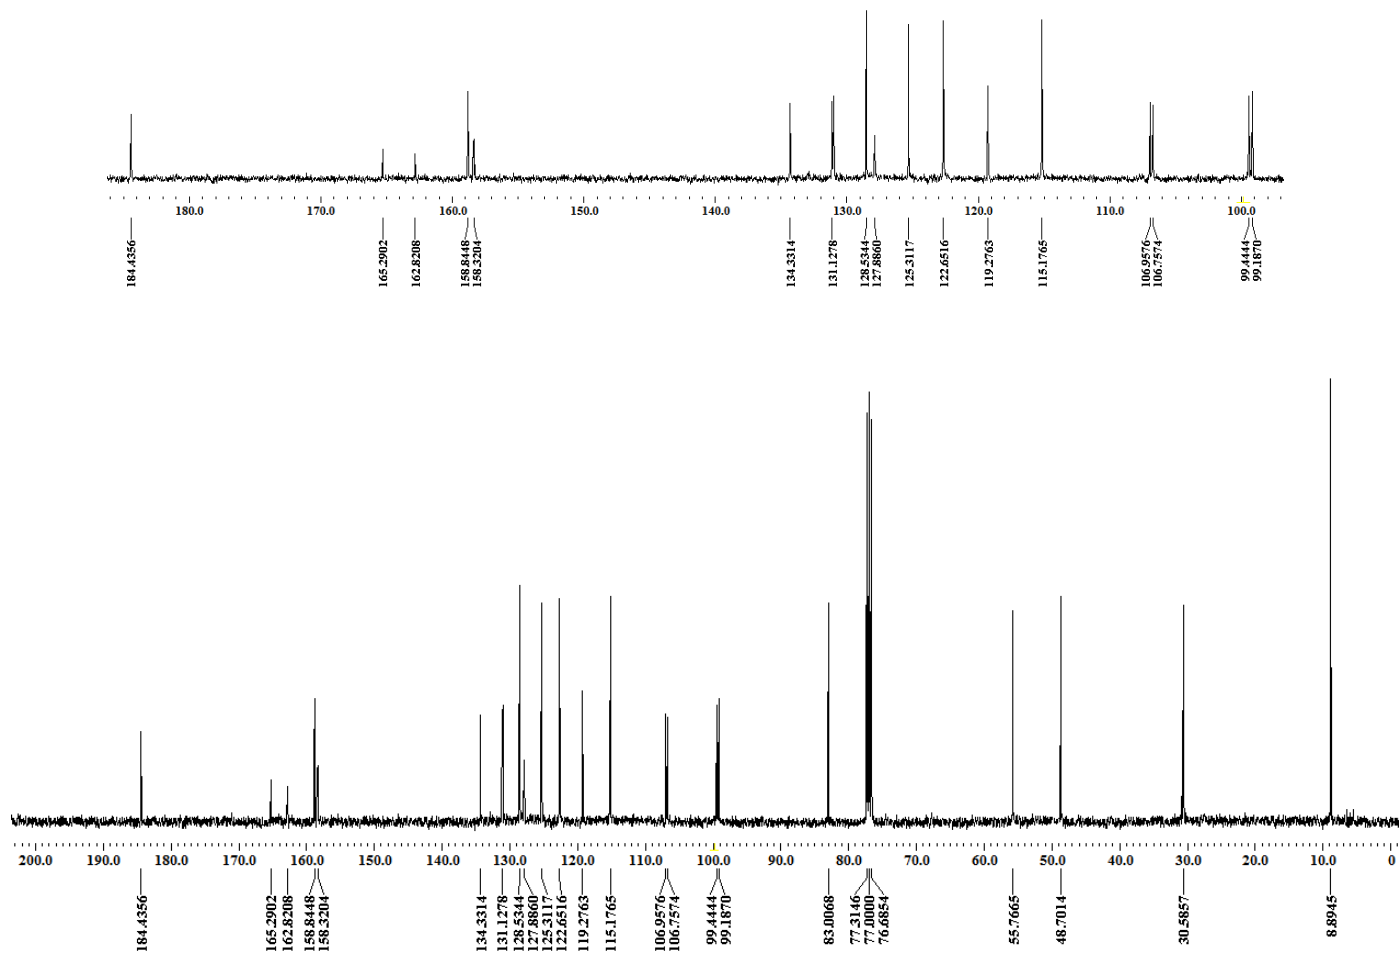

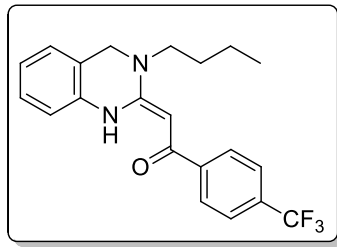

4n

$^1\text{H-NMR}$  in  $\text{CDCl}_3$  (400MHz)

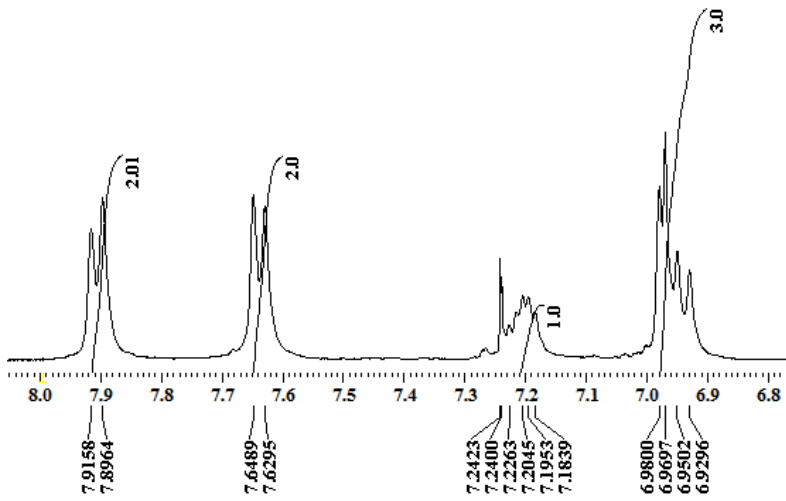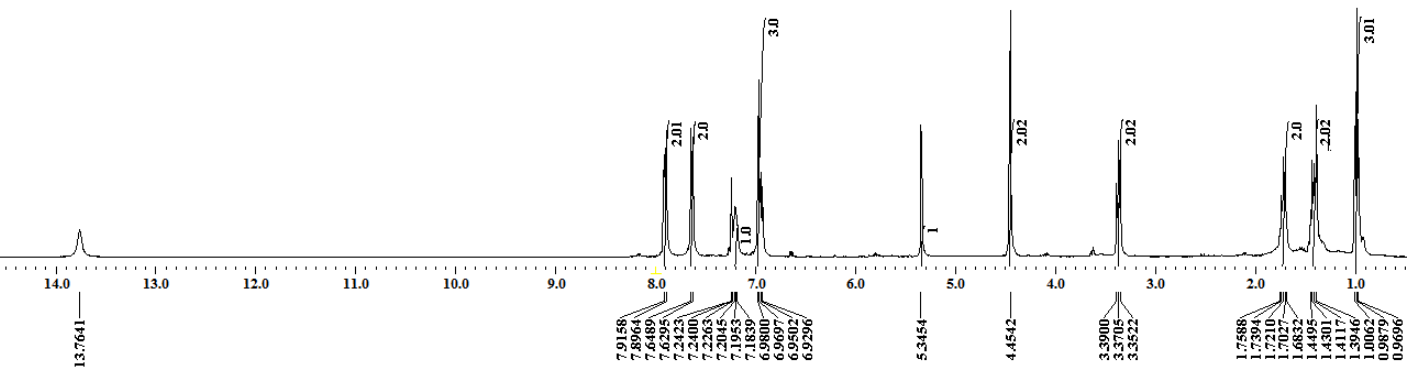

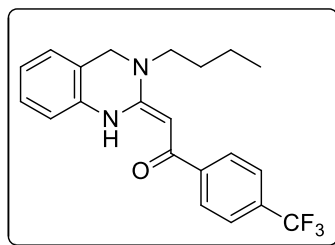

4n

$^{13}\text{C-NMR}$  in  $\text{CDCl}_3$  (100MHz)

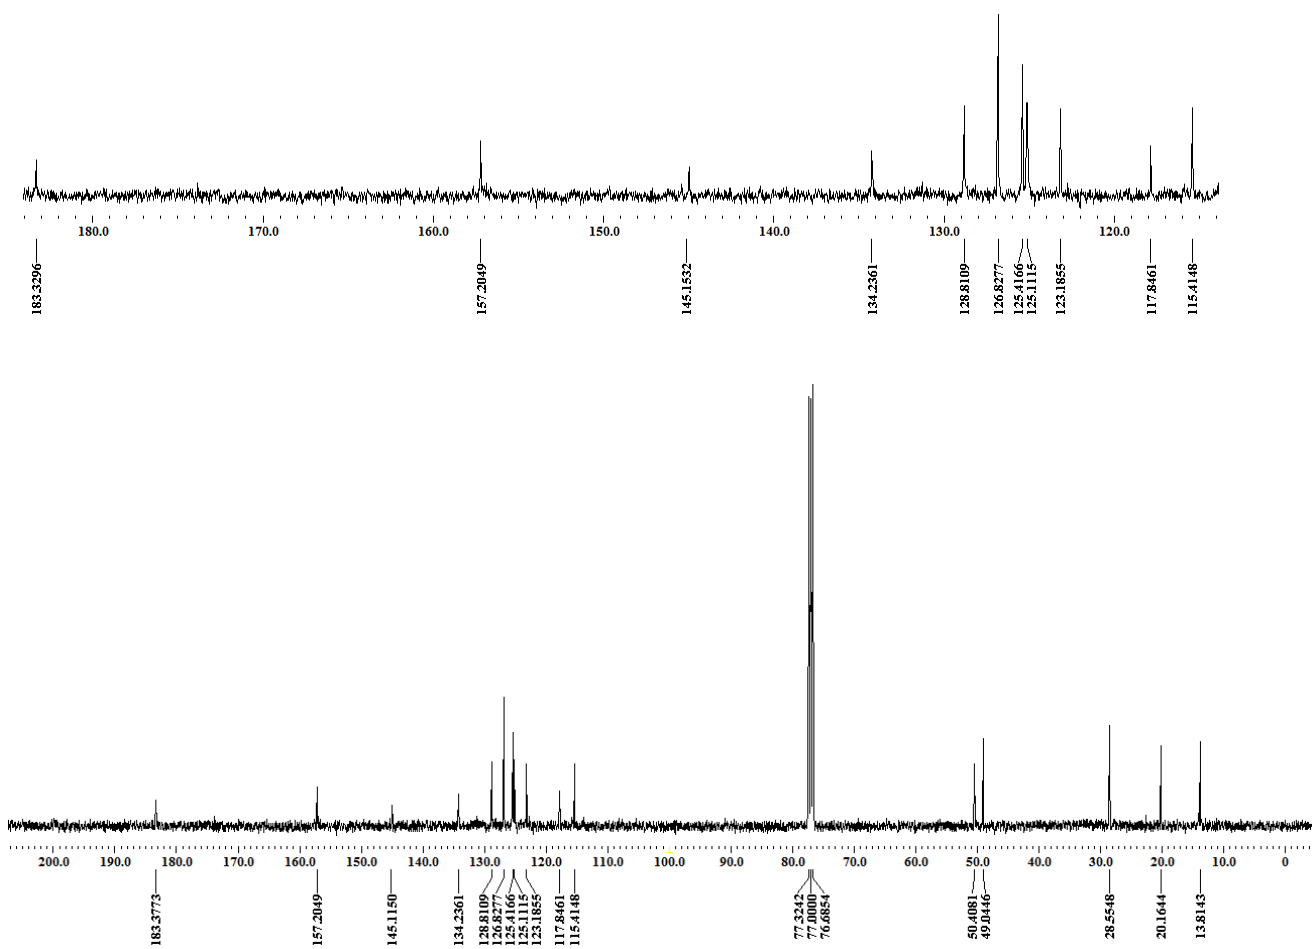

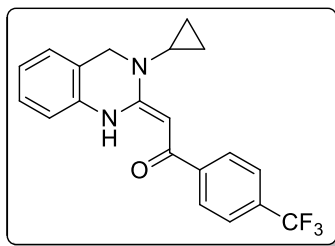

40

<sup>1</sup>H-NMR in CDCl<sub>3</sub> (400MHz)

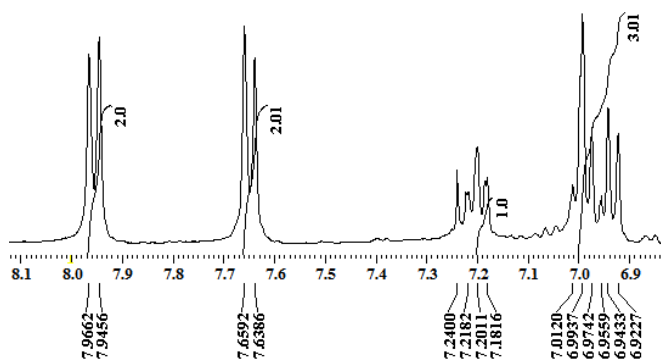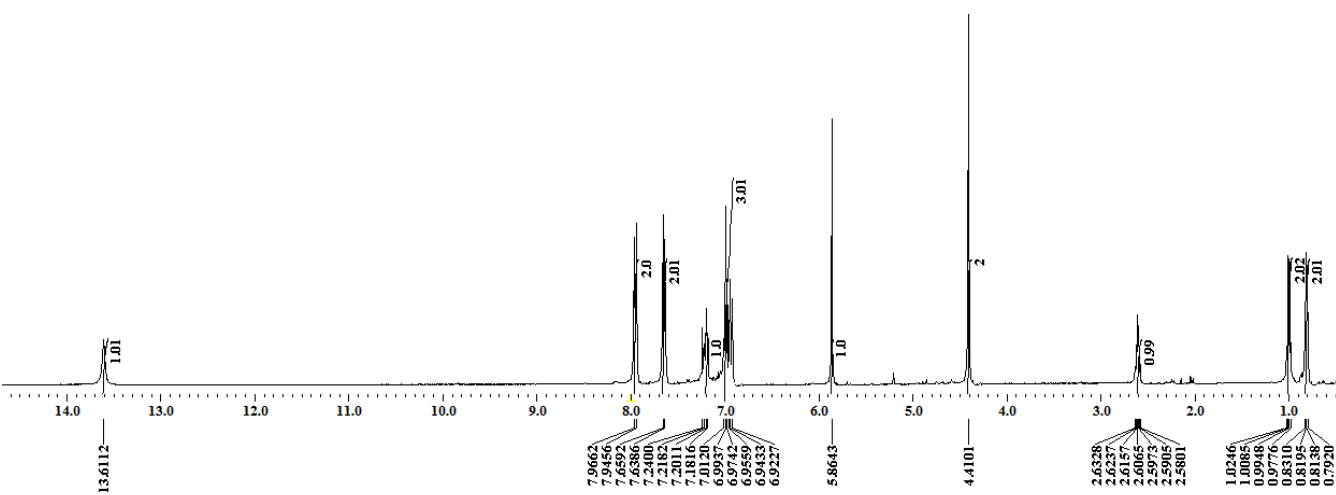



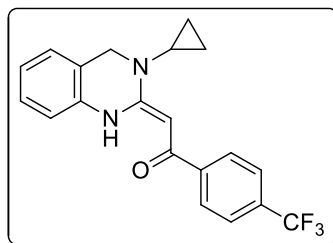

4o

$^{13}\text{C-NMR}$  in  $\text{CDCl}_3$  (100MHz)

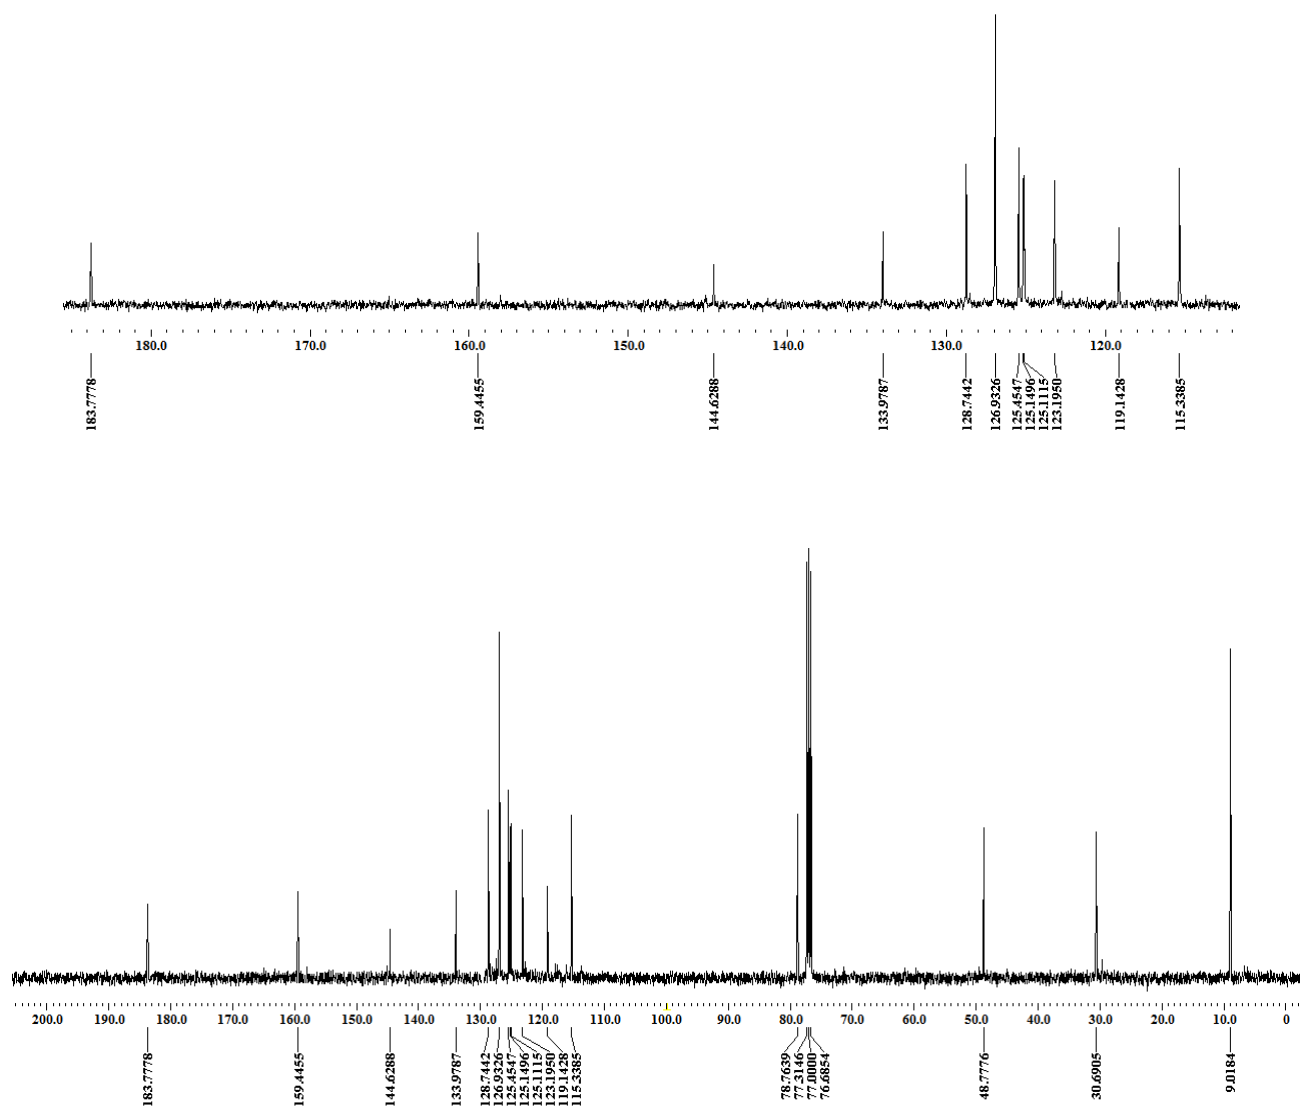

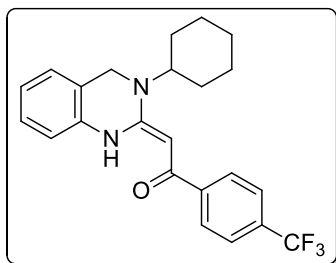

4p

<sup>1</sup>H-NMR in CDCl<sub>3</sub> (400MHz)

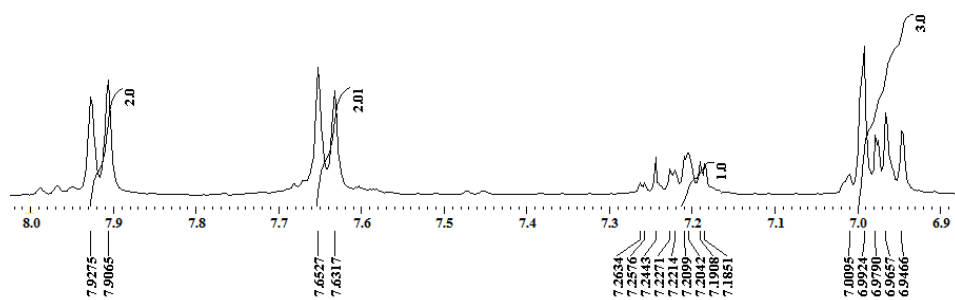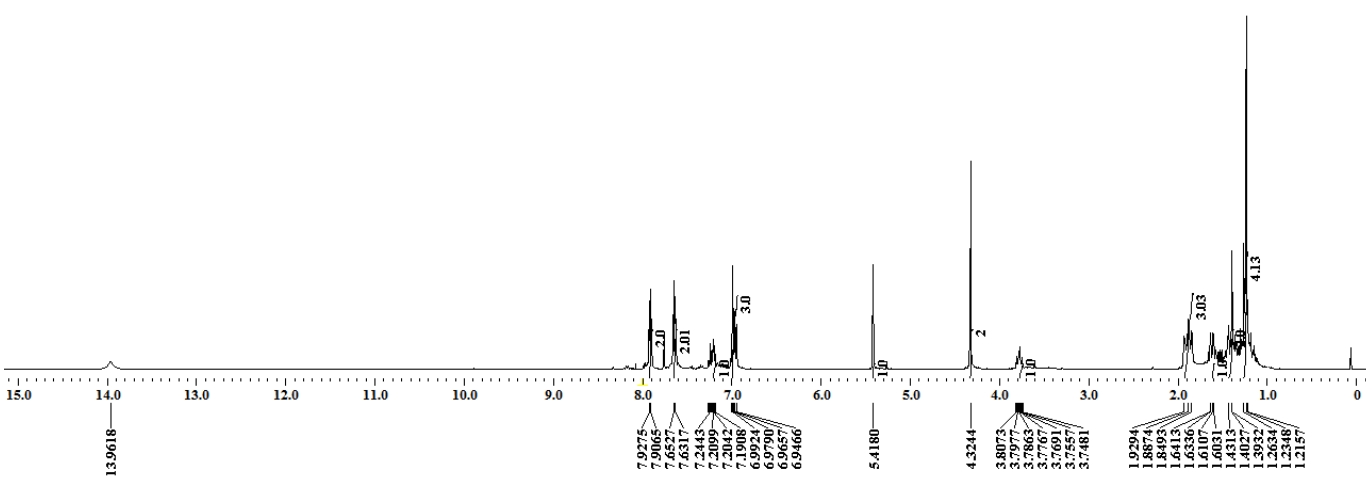

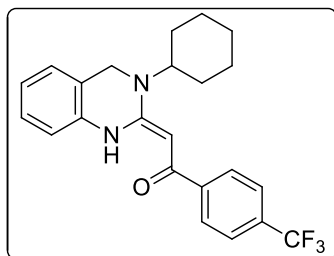

4p

$^{13}\text{C-NMR}$  in  $\text{CDCl}_3$  (100MHz)

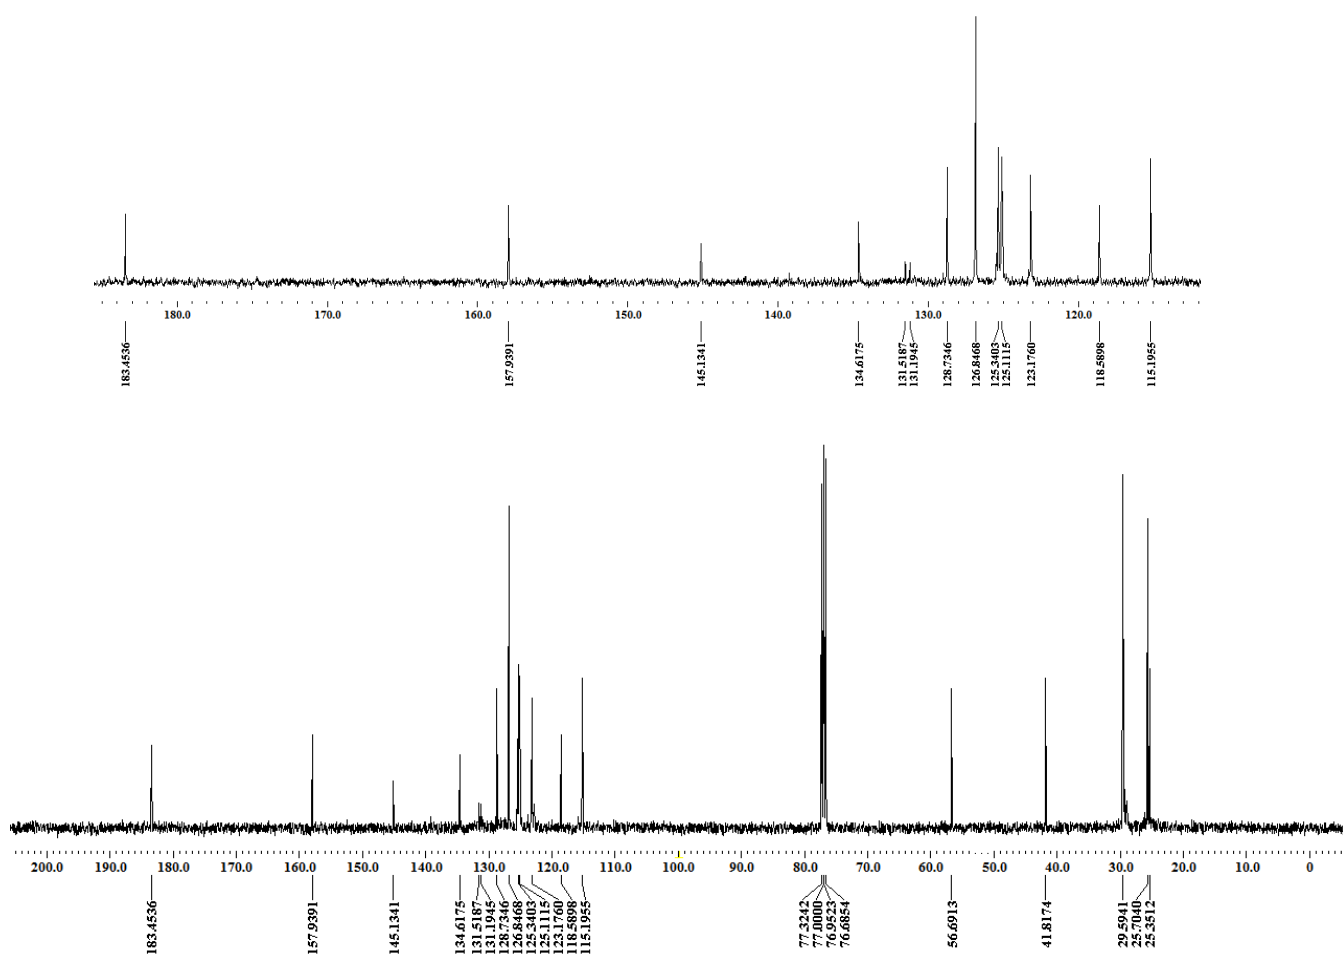

Supplement: c7ra13487h1.pdf [file c7ra13487h1.pdf]
